# Supplementary material
Source: publisher site journal article supplement (https://www.dovepress.com/article/363482)
Supplement: Supplementary file 1 [file get_supplementary_file.php]

# Supplementary materials

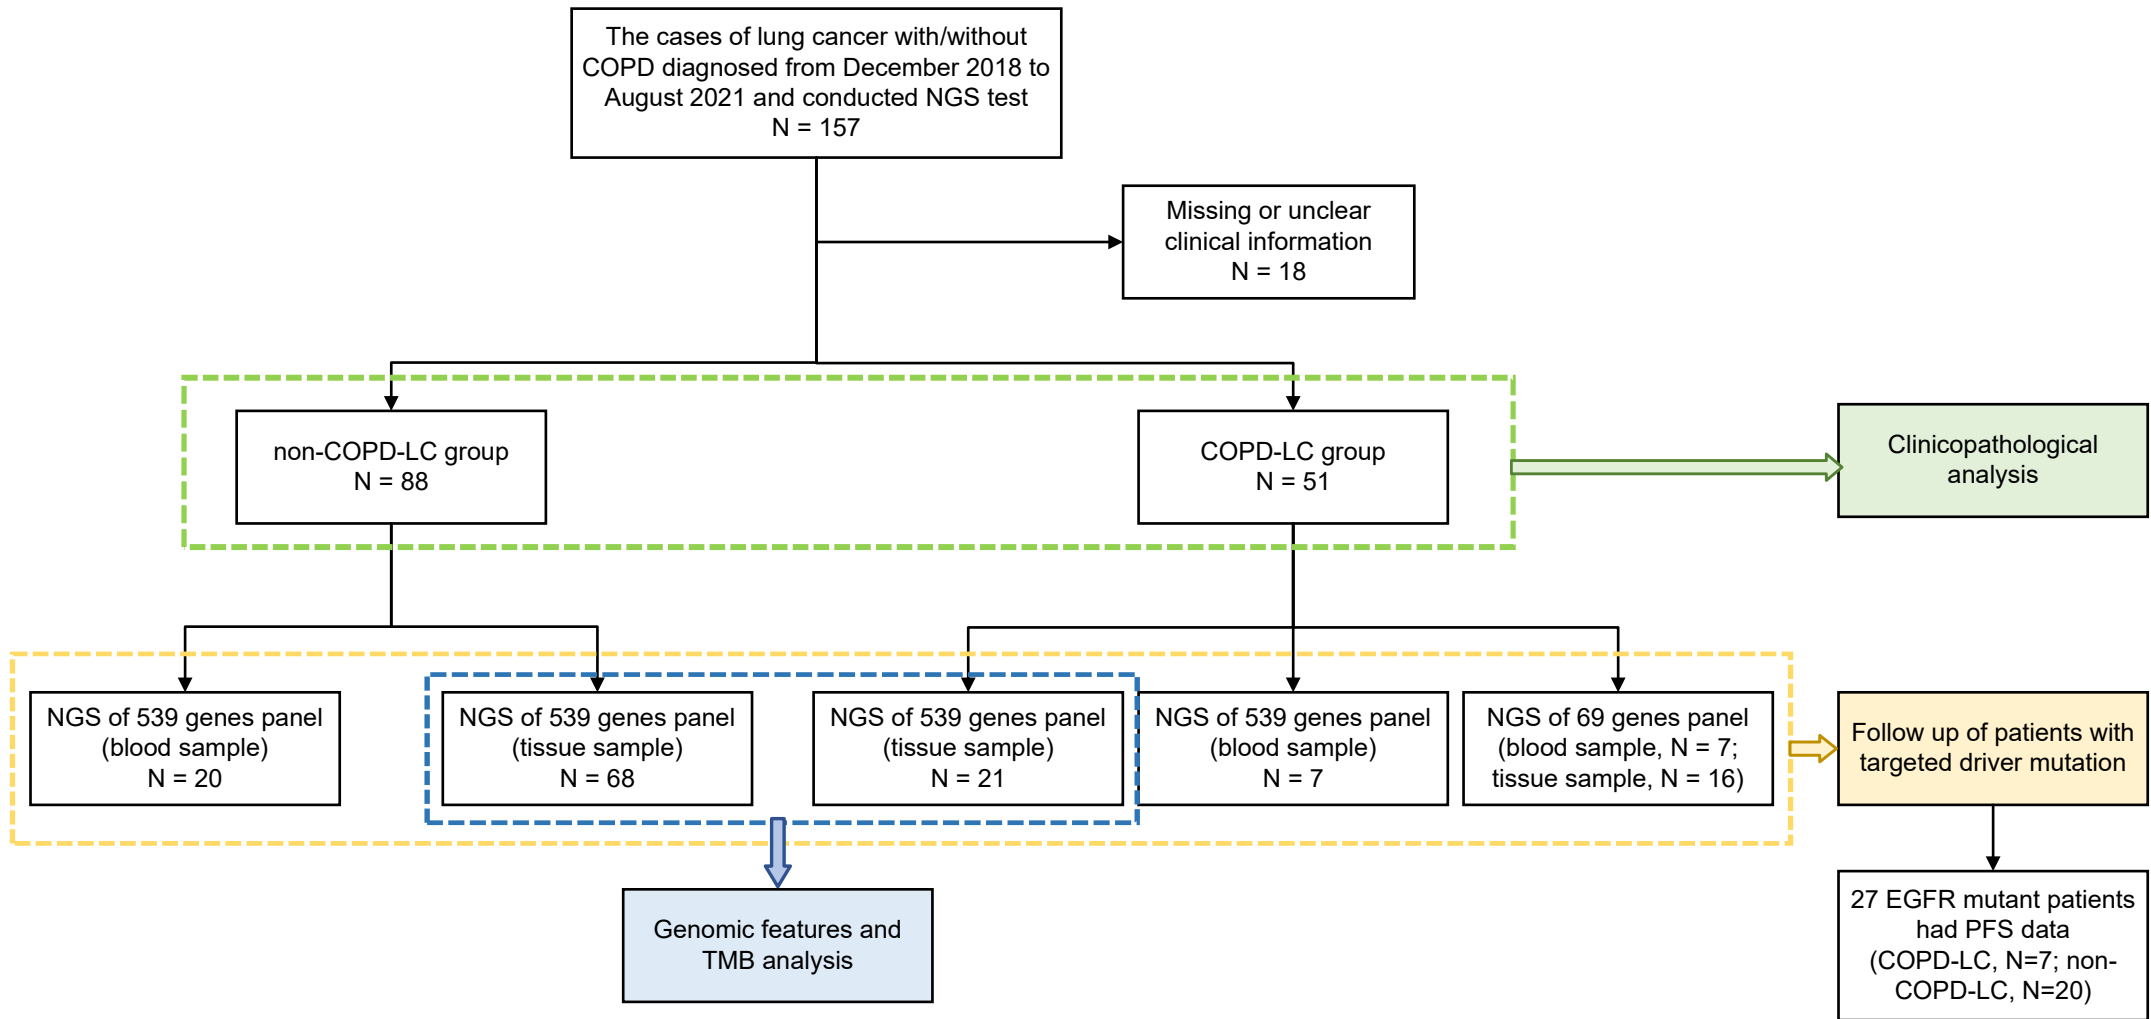

**Supplementary Figure S1.** Flowchart of this study.

(COPD: chronic obstructive pulmonary disease; COPD-LC: lung cancer with COPD; non-COPD-LC: lung cancer without COPD; NGS: next generation sequencing; TMB: tumor mutation burden)

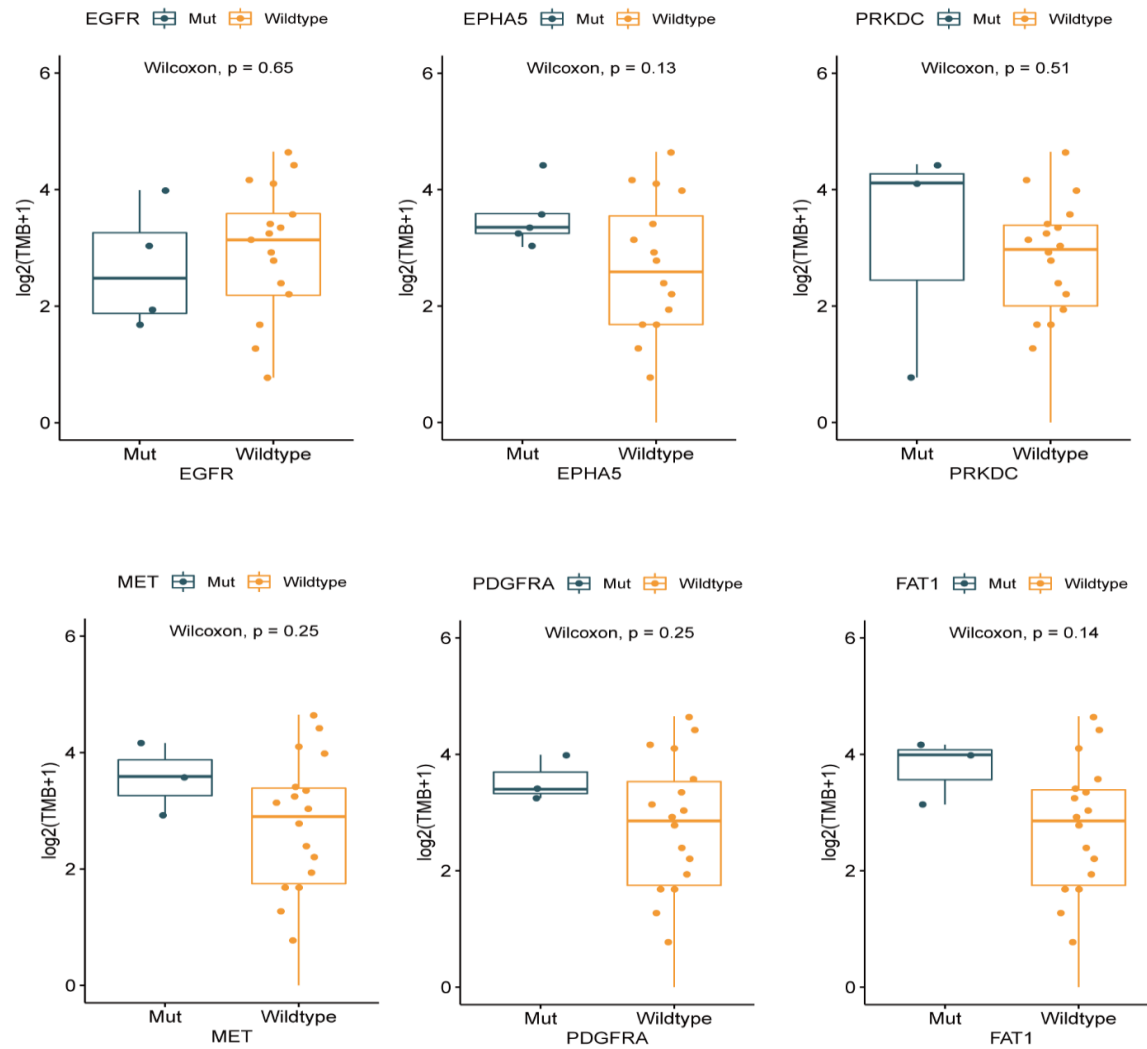

**Supplementary Figure S2.** Relationship of differential mutation genes and TMB in COPD-LC.

**Supplementary Table S1.** Detailed information of enrolled patients in our Chinese cohort.

| Patient number | Panel size | Sample type | Group | TMB   | PD-L1 expression | PD-L1 status | Age | Gender | Smoking history | Pathology type          | Stage |
|----------------|------------|-------------|-------|-------|------------------|--------------|-----|--------|-----------------|-------------------------|-------|
| P1             | panel69    | blood       | COPD  | N/A   | N/A              | N/A          | 90  | Female | N/A             | Others                  | IV    |
| P2             | panel69    | tissue      | COPD  | N/A   | N/A              | N/A          | 77  | Female | N/A             | Adenocarcinoma          | IV    |
| P3             | panel69    | tissue      | COPD  | N/A   | N/A              | N/A          | 66  | Male   | yes             | Squamous-cell carcinoma | III B |
| P4             | panel69    | blood       | COPD  | N/A   | N/A              | N/A          | 69  | Male   | yes             | Squamous-cell carcinoma | IVA   |
| P5             | panel69    | blood       | COPD  | N/A   | N/A              | N/A          | 64  | Male   | no              | Adenosquamous carcinoma | IVA   |
| P6             | panel539   | blood       | COPD  | 24    | N/A              | N/A          | 68  | Male   | no              | Adenocarcinoma          | III A |
| P7             | panel69    | tissue      | COPD  | N/A   | N/A              | N/A          | 71  | Female | no              | Adenocarcinoma          | IV    |
| P8             | panel69    | tissue      | COPD  | N/A   | TC>5%            | positive     | 81  | Male   | yes             | Adenocarcinoma          | III B |
| P9             | panel69    | blood       | COPD  | N/A   | N/A              | N/A          | 78  | Male   | N/A             | Others                  | N/A   |
| P10            | panel69    | tissue      | COPD  | N/A   | TC>80%           | positive     | 64  | Male   | no              | Squamous-cell carcinoma | III A |
| P11            | panel69    | tissue      | COPD  | N/A   | TC < 1%          | negative     | 72  | Female | no              | Adenocarcinoma          | IV B  |
| P12            | panel539   | tissue      | COPD  | 3.55  | TC>50%           | positive     | 73  | Male   | yes             | Adenocarcinoma          | IV B  |
| P13            | panel539   | tissue      | COPD  | 0.71  | TC>90%           | positive     | 73  | Female | no              | Adenocarcinoma          | IV B  |
| P14            | panel539   | tissue      | COPD  | 7.09  | TC < 1%          | negative     | 75  | Female | yes             | Adenocarcinoma          | IVA   |
| P15            | panel539   | blood       | COPD  | 3.55  | N/A              | N/A          | 75  | Male   | yes             | Adenocarcinoma          | IVA   |
| P16            | panel539   | tissue      | COPD  | 7.8   | TC≥50%           | positive     | 64  | Male   | yes             | Adenocarcinoma          | IVA   |
| P17            | panel539   | blood       | COPD  | 5.67  | N/A              | N/A          | 81  | Male   | yes             | Squamous-cell carcinoma | III B |
| P18            | panel69    | tissue      | COPD  | N/A   | N/A              | N/A          | 84  | Female | no              | Adenocarcinoma          | IV C  |
| P19            | panel539   | tissue      | COPD  | 2.84  | TC≥1%            | positive     | 84  | Male   | no              | Adenocarcinoma          | IVA   |
| P20            | panel69    | tissue      | COPD  | N/A   | N/A              | N/A          | 80  | Male   | yes             | Adenocarcinoma          | IVA   |
| P21            | panel69    | tissue      | COPD  | N/A   | N/A              | N/A          | 78  | Male   | no              | Adenosquamous carcinoma | IV    |
| P22            | panel539   | tissue      | COPD  | 1.42  | TC > 5%          | positive     | 56  | Male   | no              | Adenocarcinoma          | II B  |
| P23            | panel539   | tissue      | COPD  | 16.31 | TC>90%           | positive     | 77  | Male   | no              | Adenocarcinoma          | IV B  |
| P24            | panel539   | blood       | COPD  | 30.5  | TC<1%            | negative     | 84  | Male   | yes             | Adenocarcinoma          | IV B  |
| P25            | panel539   | tissue      | COPD  | 24.11 | TC<1%            | negative     | 71  | Male   | yes             | Adenocarcinoma          | III B |
| P26            | panel539   | tissue      | COPD  | 9.22  | TC>80%           | positive     | 74  | Male   | yes             | Adenocarcinoma          | III C |
| P27            | panel539   | blood       | COPD  | 1.42  | TC > 5%          | positive     | 78  | Male   | yes             | Squamous-cell carcinoma | II B  |
| P28            | panel69    | blood       | COPD  | N/A   | N/A              | N/A          | 76  | Male   | N/A             | Adenocarcinoma          | IV    |
| P29            | panel69    | tissue      | COPD  | N/A   | N/A              | N/A          | 69  | Female | no              | Adenocarcinoma          | I A   |
| P30            | panel69    | tissue      | COPD  | N/A   | TC≥50%           | positive     | 57  | Male   | yes             | Squamous-cell carcinoma | III A |
| P31            | panel539   | tissue      | COPD  | 14.89 | TC<1%            | negative     | 76  | Male   | yes             | Adenocarcinoma          | III B |
| P32            | panel69    | blood       | COPD  | N/A   | TC > 90%         | positive     | 77  | Male   | no              | Squamous-cell carcinoma | IVA   |
| P33            | panel539   | tissue      | COPD  | 0     | TC=0             | negative     | 78  | Male   | yes             | Adenocarcinoma          | IVA   |
| P34            | panel539   | tissue      | COPD  | 11.03 | TC > 10%         | positive     | 76  | Male   | no              | Adenocarcinoma          | III B |
| P35            | panel69    | tissue      | COPD  | N/A   | TC > 5%          | positive     | 74  | Male   | yes             | Adenocarcinoma          | IVA   |
| P36            | panel69    | tissue      | COPD  | N/A   | TC=0             | negative     | 76  | Female | no              | Adenocarcinoma          | IV B  |
| P37            | panel539   | tissue      | COPD  | 20.59 | TC=0             | negative     | 78  | Male   | yes             | Adenocarcinoma          | IVA   |
| P38            | panel69    | blood       | COPD  | N/A   | N/A              | N/A          | 87  | Male   | yes             | Others                  | IV    |
| P39            | panel539   | tissue      | COPD  | 2.21  | TC > 60%         | positive     | 66  | Male   | yes             | Adenocarcinoma          | IV    |
| P40            | panel539   | blood       | COPD  | 2.94  | N/A              | N/A          | 57  | Female | no              | Others                  | III B |
| P41            | panel539   | tissue      | COPD  | 9.56  | TC=0             | negative     | 63  | Male   | yes             | Squamous-cell carcinoma | III B |
| P42            | panel539   | tissue      | COPD  | 2.21  | TC > 5%          | positive     | 76  | Female | no              | Adenocarcinoma          | IVA   |
| P43            | panel539   | tissue      | COPD  | 6.62  | TC < 1%          | negative     | 63  | Male   | yes             | Squamous-cell carcinoma | IVA   |
| P44            | panel69    | tissue      | COPD  | N/A   | TC=0             | negative     | 65  | Male   | yes             | Squamous-cell carcinoma | IVA   |
| P45            | panel69    | tissue      | COPD  | N/A   | N/A              | N/A          | 83  | Male   | yes             | Squamous-cell carcinoma | IVA   |
| P46            | panel69    | tissue      | COPD  | N/A   | TC≥50%           | positive     | 76  | Male   | yes             | Adenocarcinoma          | IVA   |
| P47            | panel539   | tissue      | COPD  | 16.91 | TC > 25%         | positive     | 76  | Male   | yes             | Adenocarcinoma          | IVA   |
| P48            | panel539   | blood       | COPD  | 10.29 | N/A              | N/A          | 80  | Male   | yes             | Others                  | IV B  |
| P49            | panel539   | tissue      | COPD  | 5.88  | TC≥50%           | positive     | 59  | Male   | yes             | Squamous-cell carcinoma | I A2  |
| P50            | panel539   | tissue      | COPD  | 8.51  | TC=0             | negative     | 63  | Male   | no              | Adenocarcinoma          | IVA   |
| P51            | panel539   | tissue      | COPD  | 4.26  | TC > 10%         | positive     | 71  | Male   | yes             | Adenocarcinoma          | IVA   |

| Patient number | Panel size | Sample type | Group    | TMB   | PD-L1 expression | PD-L1 status | Age | Gender | Smoking history | Pathology type          | Stage |
|----------------|------------|-------------|----------|-------|------------------|--------------|-----|--------|-----------------|-------------------------|-------|
| P52            | panel539   | tissue      | non-COPD | 2.21  | TC $\geq$ 1%     | positive     | 48  | Male   | yes             | Adneocarcinoma          | IVA   |
| P53            | panel539   | tissue      | non-COPD | 5.88  | TC=0             | negative     | 64  | Male   | yes             | Adneocarcinoma          | IVA   |
| P54            | panel539   | tissue      | non-COPD | 14.71 | TC=0             | negative     | 56  | Male   | yes             | Squamous-cell carcinoma | II B  |
| P55            | panel539   | tissue      | non-COPD | 1.47  | TC < 1%          | negative     | 79  | Female | yes             | Adneocarcinoma          | IIIA  |
| P56            | panel539   | tissue      | non-COPD | 1.42  | TC < 1%          | negative     | 49  | Female | no              | Adneocarcinoma          | I A2  |
| P57            | panel539   | tissue      | non-COPD | 4.96  | TC < 1%          | negative     | 64  | Male   | yes             | Adneocarcinoma          | IV    |
| P58            | panel539   | tissue      | non-COPD | 2.13  | TC < 1%          | negative     | 54  | Female | no              | Adneocarcinoma          | I A1  |
| P59            | panel539   | tissue      | non-COPD | 2.84  | TC > 70%         | positive     | 58  | Male   | yes             | Squamous-cell carcinoma | IIIA  |
| P60            | panel539   | tissue      | non-COPD | 0.71  | TC $\geq$ 1%     | positive     | 61  | Male   | yes             | Adneocarcinoma          | IVA   |
| P61            | panel539   | tissue      | non-COPD | 7.8   | TC=0             | negative     | 73  | Male   | yes             | Adneocarcinoma          | IVB   |
| P62            | panel539   | tissue      | non-COPD | 8.51  | TC=0             | negative     | 72  | Male   | yes             | Adneocarcinoma          | IVA   |
| P63            | panel539   | tissue      | non-COPD | 2.84  | TC > 90%         | positive     | 58  | Female | no              | Adneocarcinoma          | IVB   |
| P64            | panel539   | tissue      | non-COPD | 13.48 | TC > 5%          | positive     | 83  | Male   | yes             | Adneocarcinoma          | IVA   |
| P65            | panel539   | tissue      | non-COPD | 2.84  | TC $\geq$ 50%    | positive     | 53  | Male   | yes             | Adneocarcinoma          | IVA   |
| P66            | panel539   | tissue      | non-COPD | 2.13  | TC=0             | negative     | 73  | Female | no              | Adneocarcinoma          | IVB   |
| P67            | panel539   | tissue      | non-COPD | 2.84  | TC $\geq$ 50%    | positive     | 57  | Male   | yes             | Adneocarcinoma          | IVA   |
| P68            | panel539   | tissue      | non-COPD | 1.42  | TC > 25%         | positive     | 69  | Female | no              | Adneocarcinoma          | IVA   |
| P69            | panel539   | tissue      | non-COPD | 3.55  | TC > 10%         | positive     | 66  | Female | no              | Adneocarcinoma          | IVA   |
| P70            | panel539   | tissue      | non-COPD | 1.42  | N/A              | N/A          | 67  | Female | no              | Adneocarcinoma          | IVA   |
| P71            | panel539   | tissue      | non-COPD | 3.55  | TC $\geq$ 1%     | positive     | 71  | Female | no              | Adneocarcinoma          | IVA   |
| P72            | panel539   | tissue      | non-COPD | 1.42  | TC=0             | negative     | 76  | Female | no              | Adneocarcinoma          | IVB   |
| P73            | panel539   | tissue      | non-COPD | 0     | TC=0             | negative     | 73  | Female | no              | Adneocarcinoma          | IVA   |
| P74            | panel539   | tissue      | non-COPD | 0.71  | N/A              | N/A          | 68  | Male   | yes             | Others                  | IIIC  |
| P75            | panel539   | tissue      | non-COPD | 1.42  | TC < 1%          | negative     | 69  | Female | no              | Others                  | II B  |
| P76            | panel539   | tissue      | non-COPD | 1.42  | TC $\geq$ 50%    | positive     | 54  | Male   | yes             | Squamous-cell carcinoma | IVA   |
| P77            | panel539   | tissue      | non-COPD | 0     | TC=0             | negative     | 80  | Female | no              | Adneocarcinoma          | IVA   |
| P78            | panel539   | tissue      | non-COPD | 1.42  | TC $\geq$ 50%    | positive     | 77  | Male   | yes             | Squamous-cell carcinoma | IVB   |
| P79            | panel539   | tissue      | non-COPD | 3.55  | TC $\geq$ 1%     | positive     | 66  | Male   | yes             | Adneocarcinoma          | IVA   |
| P80            | panel539   | tissue      | non-COPD | 4.96  | TC < 1%          | negative     | 80  | Male   | no              | Adneocarcinoma          | IVA   |
| P81            | panel539   | tissue      | non-COPD | 1.47  | N/A              | N/A          | 51  | Female | no              | Adneocarcinoma          | N/A   |
| P82            | panel539   | tissue      | non-COPD | 7.35  | N/A              | N/A          | 73  | Male   | yes             | Squamous-cell carcinoma | IIIB  |
| P83            | panel539   | tissue      | non-COPD | 0     | TC=0             | negative     | 76  | Female | no              | Adneocarcinoma          | I A   |
| P84            | panel539   | tissue      | non-COPD | 25    | TC=0             | negative     | 75  | Female | no              | Squamous-cell carcinoma | N/A   |
| P85            | panel539   | tissue      | non-COPD | 10.29 | TC=0             | negative     | 55  | Male   | yes             | Adneocarcinoma          | IVB   |
| P86            | panel539   | tissue      | non-COPD | 2.21  | TC > 10%         | positive     | 73  | Female | no              | Adneocarcinoma          | IVA   |
| P87            | panel539   | tissue      | non-COPD | 1.47  | TC < 1%          | negative     | 75  | Female | no              | Adneocarcinoma          | IVA   |
| P88            | panel539   | tissue      | non-COPD | 2.94  | TC > 60%         | positive     | 60  | Male   | yes             | Adneocarcinoma          | IV    |
| P89            | panel539   | tissue      | non-COPD | 2.94  | TC=0             | negative     | 68  | Female | no              | Adneocarcinoma          | IV    |
| P90            | panel539   | tissue      | non-COPD | 7.35  | TC=0             | negative     | 85  | Female | no              | Squamous-cell carcinoma | IV    |
| P91            | panel539   | tissue      | non-COPD | 4.41  | TC=0             | negative     | 69  | Female | no              | Adneocarcinoma          | N/A   |
| P92            | panel539   | tissue      | non-COPD | 0.74  | TC=0             | negative     | 58  | Female | no              | Adneocarcinoma          | I A2  |
| P93            | panel539   | tissue      | non-COPD | 2.94  | TC > 5%          | positive     | 51  | Male   | yes             | Adneocarcinoma          | IVB   |
| P94            | panel539   | tissue      | non-COPD | 6.62  | TC < 1%          | negative     | 74  | Female | no              | Adneocarcinoma          | IVA   |
| P95            | panel539   | tissue      | non-COPD | 0     | TC > 10%         | positive     | 56  | Female | no              | Adneocarcinoma          | IVB   |

| Patient number | Panel size | Sample type | Group    | TMB   | PD-L1 expression | PD-L1 status | Age | Gender | Smoking history | Pathology type          | Stage |
|----------------|------------|-------------|----------|-------|------------------|--------------|-----|--------|-----------------|-------------------------|-------|
| P96            | panel539   | tissue      | non-COPD | 1.47  | TC > 70%         | positive     | 54  | Male   | no              | Adneocarcinoma          | IVA   |
| P97            | panel539   | tissue      | non-COPD | 5.88  | TC ≥ 1%          | positive     | 86  | Female | no              | Adneocarcinoma          | III B |
| P98            | panel539   | tissue      | non-COPD | 2.94  | TC ≥ 1%          | positive     | 78  | Male   | no              | Adneocarcinoma          | I B   |
| P99            | panel539   | tissue      | non-COPD | 2.94  | TC < 1%          | negative     | 70  | Female | no              | Adneocarcinoma          | IV    |
| P100           | panel539   | tissue      | non-COPD | 2.94  | TC < 1%          | negative     | 76  | Male   | yes             | Adneocarcinoma          | IVA   |
| P101           | panel539   | tissue      | non-COPD | 2.94  | TC < 1%          | negative     | 53  | Female | no              | Adneocarcinoma          | I A2  |
| P102           | panel539   | tissue      | non-COPD | 4.41  | TC=0             | negative     | 64  | Female | no              | Adneocarcinoma          | IIIC  |
| P103           | panel539   | tissue      | non-COPD | 5.88  | TC < 1%          | negative     | 54  | Male   | yes             | Adneocarcinoma          | IIIC  |
| P104           | panel539   | tissue      | non-COPD | 3.68  | TC > 5%          | positive     | 86  | Male   | yes             | Adneocarcinoma          | IVA   |
| P105           | panel539   | tissue      | non-COPD | 5.88  | TC ≥ 50%         | positive     | 47  | Male   | yes             | Adneocarcinoma          | IVB   |
| P106           | panel539   | tissue      | non-COPD | 1.47  | TC ≥ 1%          | positive     | 48  | Female | no              | Adneocarcinoma          | IV    |
| P107           | panel539   | tissue      | non-COPD | 4.41  | TC ≥ 1%          | positive     | 75  | Female | no              | Adneocarcinoma          | IVB   |
| P108           | panel539   | tissue      | non-COPD | 2.94  | TC ≥ 50%         | positive     | 66  | Male   | yes             | Adneocarcinoma          | IV    |
| P109           | panel539   | tissue      | non-COPD | 0.74  | TC=0             | negative     | 69  | Male   | no              | Squamous-cell carcinoma | IVA   |
| P110           | panel539   | tissue      | non-COPD | 2.94  | TC > 25%         | positive     | 67  | Male   | yes             | Adneocarcinoma          | IVA   |
| P111           | panel539   | tissue      | non-COPD | 7.35  | TC ≥ 50%         | positive     | 72  | Male   | no              | adenosquamous carcinoma | IV    |
| P112           | panel539   | blood       | non-COPD | 11.76 | TC=0             | negative     | 80  | Male   | no              | Squamous-cell carcinoma | IVA   |
| P113           | panel539   | blood       | non-COPD | 0.74  | N/A              | N/A          | 69  | Female | no              | Adneocarcinoma          | IVB   |
| P114           | panel539   | blood       | non-COPD | 10.64 | N/A              | N/A          | 52  | Male   | yes             | Adneocarcinoma          | IVB   |
| P115           | panel539   | blood       | non-COPD | 0.71  | N/A              | N/A          | 59  | Female | no              | Adneocarcinoma          | IVA   |
| P116           | panel539   | blood       | non-COPD | 2.13  | TC ≥ 50%         | positive     | 48  | Male   | yes             | Adneocarcinoma          | IVB   |
| P117           | panel539   | blood       | non-COPD | 0     | N/A              | N/A          | 73  | Female | no              | Adneocarcinoma          | IV    |
| P118           | panel539   | blood       | non-COPD | 1.42  | TC=0             | negative     | 60  | Male   | no              | Adneocarcinoma          | IVB   |
| P119           | panel539   | blood       | non-COPD | 2.13  | TC ≥ 50%         | positive     | 79  | Female | no              | Adneocarcinoma          | N/A   |
| P120           | panel539   | blood       | non-COPD | 1.42  | N/A              | N/A          | 51  | Male   | yes             | Adneocarcinoma          | IVB   |
| P121           | panel539   | blood       | non-COPD | 6.38  | TC > 70%         | positive     | 74  | Male   | yes             | Others                  | IVB   |
| P122           | panel539   | blood       | non-COPD | 28.37 | TC=0             | negative     | 81  | Female | yes             | Squamous-cell carcinoma | IVA   |
| P123           | panel539   | blood       | non-COPD | 4.41  | N/A              | N/A          | 61  | Male   | yes             | Adneocarcinoma          | IV    |
| P124           | panel539   | blood       | non-COPD | 0     | TC ≥ 1%          | positive     | 65  | Female | no              | Squamous-cell carcinoma | IVA   |
| P125           | panel539   | blood       | non-COPD | 0.74  | TC < 1%          | negative     | 52  | Female | no              | Adneocarcinoma          | IVB   |
| P126           | panel539   | blood       | non-COPD | 11.76 | TC ≥ 50%         | positive     | 74  | Female | no              | Adneocarcinoma          | IVA   |
| P127           | panel539   | blood       | non-COPD | 1.47  | TC ≥ 1%          | positive     | 78  | Female | no              | Adneocarcinoma          | IVA   |
| P128           | panel539   | blood       | non-COPD | 1.47  | N/A              | N/A          | 61  | Female | no              | Adneocarcinoma          | IVB   |
| P129           | panel539   | blood       | non-COPD | 0     | TC ≥ 50%         | positive     | 71  | Female | no              | Adneocarcinoma          | IVA   |
| P130           | panel539   | blood       | non-COPD | 4.41  | N/A              | N/A          | 74  | Male   | yes             | Adneocarcinoma          | IVA   |
| P131           | panel539   | blood       | non-COPD | 2.21  | N/A              | N/A          | 64  | Female | no              | Squamous-cell carcinoma | IV    |
| P132           | panel539   | tissue      | non-COPD | 1.47  | TC ≥ 1%          | positive     | 66  | Female | no              | Adneocarcinoma          | IIIA  |
| P133           | panel539   | tissue      | non-COPD | 0.74  | TC ≥ 1%          | positive     | 53  | Female | no              | Adneocarcinoma          | IV    |
| P134           | panel539   | tissue      | non-COPD | 4.41  | TC > 25%         | positive     | 82  | Female | no              | Adneocarcinoma          | IVA   |
| P135           | panel539   | tissue      | non-COPD | 1.42  | TC=0             | negative     | 49  | Female | no              | Adneocarcinoma          | I A1  |
| P136           | panel539   | tissue      | non-COPD | 3.68  | TC ≥ 50%         | positive     | 54  | Male   | yes             | Adneocarcinoma          | IVA   |
| P137           | panel539   | tissue      | non-COPD | 11.35 | TC=0             | negative     | 58  | Male   | yes             | Squamous-cell carcinoma | IVB   |
| P138           | panel539   | tissue      | non-COPD | 3.68  | TC < 1%          | negative     | 70  | Male   | yes             | Adneocarcinoma          | IVA   |
| P139           | panel539   | tissue      | non-COPD | 4.26  | TC > 5%          | positive     | 81  | Male   | no              | Adneocarcinoma          | IVB   |

| Patient number | C-reaction protein | Procalcitonin | Interleukin-6 | D dimer | Hemoglobin | Percentage of lymphocytes | Monocyte percentage | Neutrophil percentage | eosinophils percentage | Absolute value of eosinophils | Erythrocyte sedimentation rate | Albumin | Alpha-fetoprotein (AFP) | Carcinoembryonic antigen (CEA) | Cytokeratin -19 (CYF) | Neuron-specific enolase(NSE) | Squamous cell carcinoma antigen (SCC) |
|----------------|--------------------|---------------|---------------|---------|------------|---------------------------|---------------------|-----------------------|------------------------|-------------------------------|--------------------------------|---------|-------------------------|--------------------------------|-----------------------|------------------------------|---------------------------------------|
| P1             | 11.2               | 0.11          | 3.95          | N/A     | 112        | 16.3                      | 10                  | 72.8                  | 0.5                    | 0.05                          | 6                              | 31.9    | 1.36                    | 4.38                           | 10.21                 | 15.28                        | 1.3                                   |
| P2             | 168.5              | 0.31          | 158.8         | N/A     | 139        | 3.8                       | 5.8                 | 89.7                  | 0.6                    | 0.1                           | 28                             | 28.2    | 2.32                    | 2.28                           | 9.51                  | 16.09                        | 1.7                                   |
| P3             | N/A                | 0.05          | 6.54          | N/A     | 143        | 17.22                     | 8.8                 | 72.51                 | 1.5                    | 0.13                          | 3                              | 39.3    | 3.12                    | 2.27                           | 1.81                  | 17.82                        | 0.9                                   |
| P4             | 5.4                | 0.03          | 1.9           | N/A     | 169        | 37.8                      | 8.3                 | 50.6                  | 2.6                    | 0.16                          | 2                              | 37.9    | 4.13                    | 2.09                           | 10.11                 | 15.01                        | 3.5                                   |
| P5             | 5                  | 0.03          | 6.64          | N/A     | 122        | 31.2                      | 13.9                | 50.5                  | 3.4                    | 0.14                          | 25                             | 33      | 4.76                    | 5.01                           | 2.23                  | 9.79                         | 0.9                                   |
| P6             | N/A                | N/A           | N/A           | N/A     | 133        | 28.4                      | 8                   | 62.3                  | 1.3                    | 0.04                          | N/A                            | 40.69   | 2.77                    | 0.9                            | 2.76                  | 14.36                        | 0.7                                   |
| P7             | 39.9               | 0.05          | 46.2          | N/A     | 147        | 21.9                      | 9.8                 | 67.9                  | 0.2                    | 0.01                          | 36                             | 36.3    | 1.24                    | 1.56                           | 4.24                  | 31.28                        | 1.5                                   |
| P8             | 195.6              | 0.08          | 63.55         | N/A     | 119        | 3.9                       | 3.4                 | 92.1                  | 0.5                    | 0.05                          | 15                             | 31.1    | 1.53                    | 2.98                           | 7.76                  | 37.68                        | 1.4                                   |
| P9             | 116                | 0.04          | 331.2         | N/A     | 166        | 39.7                      | 0.2                 | 57.6                  | 2.1                    | 0.1                           | N/A                            | 42.4    | 4.62                    | 3.24                           | 3.49                  | 16.72                        | 1.7                                   |
| P10            | N/A                | 0.03          | 14.84         | N/A     | 171        | 21.6                      | 7.9                 | 68.7                  | 1                      | 0.11                          | 3                              | 48      | 2.49                    | 2.28                           | 2.42                  | 16.97                        | 0.7                                   |
| P11            | 5                  | 0.02          | 16.22         | 1.2     | 112        | 33.4                      | 10.1                | 50.4                  | 5.3                    | 0.19                          | 16                             | 32.27   | 1.64                    | 1.92                           | 2.12                  | 15.97                        | 1.2                                   |
| P12            | 75.4               | 0.12          | 83.71         | 1.65    | 114        | 6.5                       | 8.3                 | 84.2                  | 0.6                    | 0.06                          | 60                             | 30.7    | 1.3                     | 2.84                           | 40.27                 | 20.94                        | 0.6                                   |
| P13            | 64.2               | 0.1           | 26.09         | N/A     | 128        | 15.3                      | 8.1                 | 73.9                  | 2.2                    | 0.24                          | 29                             | 32.6    | 2.14                    | 12.64                          | 14.99                 | 21.22                        | 18.6                                  |
| P14            | 55.2               | 0.1           | 30.6          | N/A     | 124        | 8.7                       | 6.7                 | 86.9                  | 0.6                    | 0.1                           | N/A                            | 35.98   | 1.99                    | 5.02                           | 3.54                  | 12.88                        | 10.7                                  |
| P15            | 21.7               | 0.05          | 29.38         | N/A     | 145        | 17.6                      | 9.2                 | 72.3                  | 0.7                    | 0.06                          | 14                             | 35.75   | 1.72                    | 2.75                           | 6.54                  | 16.08                        | 0.7                                   |
| P16            | N/A                | N/A           | N/A           | 117     | 117        | 28.5                      | 8.5                 | 60.1                  | 2.4                    | 0.19                          | 86                             | 31.2    | 1.51                    | 2.98                           | 10.25                 | 20.36                        | 2.6                                   |
| P17            | 12.9               | 0.05          | 33.92         | 0.79    | 150        | 13.7                      | 14.7                | 70.3                  | 0.08                   | 0.7                           | 11                             | 39.44   | 1.73                    | 3.8                            | 14.63                 | 20.41                        | 8.9                                   |
| P18            | 3.19               | 0.02          | 4.96          | 1.22    | 138        | 20.7                      | 9                   | 69.6                  | 0.01                   | 0.2                           | 15                             | 35      | 3.56                    | 8.12                           | 2.83                  | 13.94                        | 0.7                                   |
| P19            | N/A                | 0.11          | 2.08          | 1.42    | 120        | 34.5                      | 8                   | 56.4                  | 0.04                   | 0.7                           | 12                             | 43.81   | 1.87                    | 6.68                           | 2.87                  | 12.51                        | 1.1                                   |
| P20            | 13.2               | 0.03          | 15.5          | 3.2     | 136        | 8.4                       | 1.1                 | 90.3                  | 0.4                    | 0                             | 28                             | 38.52   | 5.3                     | 348.2                          | 6.87                  | 19.97                        | 1.8                                   |
| P21            | 5                  | 0.04          | 24.6          | 0.98    | 142        | 24.2                      | 6.8                 | 66.1                  | 0.17                   | 2.6                           | 7                              | 30.8    | 3.78                    | 4.79                           | 12.6                  | 27.03                        | 1.1                                   |
| P22            | 8                  | 0.06          | 1.78          | 0.53    | 150        | 36                        | 10.3                | 51.4                  | 0.1                    | 1.9                           | 2                              | 38      | 1.27                    | 2.71                           | 4.16                  | 17.11                        | 1.2                                   |
| P23            | N/A                | 0.07          | 16.24         | 0.69    | 137        | 8.8                       | 8.6                 | 80.4                  | 0.16                   | 1.7                           | 27                             | 35.4    | 1.38                    | 3.39                           | 9.33                  | 23.62                        | 4.5                                   |
| P24            | 30.1               | 0.05          | 20.15         | 1.12    | 116        | 8.1                       | 13.1                | 76.8                  | 0.13                   | 1.7                           | 8                              | 36      | 2.33                    | 2.79                           | 11.37                 | 67.38                        | 0.8                                   |
| P25            | 5                  | 0.06          | 3.93          | 0.62    | 146        | 21.1                      | 3.5                 | 74.1                  | 0.08                   | 0.9                           | 13                             | 36.8    | 2.78                    | 53.64                          | 3.09                  | 15.56                        | 1.2                                   |
| P26            | 20                 | 0.02          | 11.63         | 0.66    | 124        | 19.9                      | 7.3                 | 70.9                  | 0.11                   | 1.6                           | 20                             | 36.1    | 3.15                    | 9.22                           | 22.53                 | 21.02                        | 1.4                                   |
| P27            | N/A                | N/A           | N/A           | 0.79    | 173        | 32                        | 12.1                | 51.8                  | 0.14                   | 3.4                           | N/A                            | 35.4    | 1.79                    | 3.25                           | 11.68                 | 25.09                        | 14                                    |
| P28            | N/A                | N/A           | N/A           | N/A     | N/A        | N/A                       | N/A                 | N/A                   | N/A                    | N/A                           | N/A                            | N/A     | N/A                     | N/A                            | N/A                   | N/A                          | N/A                                   |
| P29            | N/A                | N/A           | N/A           | 0.28    | 137        | 26.5                      | 7.3                 | 65.2                  | 0.5                    | 0.03                          | 13                             | 40.5    | 82.28                   | 2.61                           | 2                     | 21.25                        | 0.4                                   |
| P30            | 169.2              | 0.07          | 94.33         | 0.77    | 146        | 13.6                      | 9.4                 | 76.7                  | 0.02                   | 0.1                           | 2                              | 38.6    | 1.23                    | 4.46                           | 4.09                  | 24.29                        | 1.7                                   |
| P31            | N/A                | 0.05          | 14.08         | 0.82    | 136        | 22.1                      | 8.9                 | 66.4                  | 0.22                   | 2.4                           | 59                             | 34.8    | 3.56                    | 97.44                          | 22.32                 | 17.94                        | 2.7                                   |
| P32            | 5                  | 0.03          | 7.43          | 0.38    | 123        | 32.6                      | 7.4                 | 56.4                  | 0.17                   | 2.9                           | 14                             | 33.3    | 2.83                    | 3.46                           | 6.67                  | 16.29                        | 2                                     |
| P33            | 43.3               | N/A           | N/A           | 0.99    | 141        | 18.4                      | 9.5                 | 68.6                  | 0.29                   | 3                             | 24                             | 35.16   | 5.58                    | 7.52                           | 9.08                  | 14.76                        | 1.4                                   |
| P34            | 2.14               | N/A           | 1.5           | 0.34    | 134        | 25.4                      | 15.7                | 57.5                  | 0.06                   | 1.2                           | 10                             | 37.4    | 2.22                    | 16.52                          | 3.22                  | 16.62                        | 0.7                                   |
| P35            | 28.7               | 0.02          | 4.9           | 0.86    | 119        | 28                        | 8.4                 | 58.3                  | 0.24                   | 5.1                           | 42                             | 30.5    | 1.85                    | 25.93                          | 4.64                  | 14.96                        | 4.7                                   |
| P36            | 60.1               | 0.13          | N/A           | 2.5     | 94         | 51.3                      | 19.3                | 19.8                  | 0.36                   | 9.6                           | 10                             | 63.52   | 4.66                    | 11.91                          | 12.27                 | 16.83                        | 2.4                                   |
| P37            | 51.7               | N/A           | N/A           | 6.01    | 113        | 11.5                      | 9.5                 | 77.9                  | 0.04                   | 0.4                           | 20                             | 32.1    | N/A                     | N/A                            | N/A                   | N/A                          | 3.3                                   |
| P38            | 21.8               | 0.05          | 27.02         | 8.46    | 118        | 21.6                      | 9.2                 | 64.5                  | 0.24                   | 4                             | N/A                            | 33.7    | 2.35                    | 3.15                           | 63.77                 | 26.1                         | 2.9                                   |
| P39            | 56.2               | N/A           | N/A           | 0.76    | 94         | 7.1                       | 13.4                | 76.8                  | 0.2                    | 2.5                           | N/A                            | 24      | 1.22                    | 19.67                          | 43.21                 | N/A                          | 0.7                                   |
| P40            | 3.72               | 0.02          | 5.99          | 9.76    | 137        | 32                        | 10                  | 56.1                  | 0.09                   | 1.7                           | 10                             | N/A     | 4.42                    | 3.2                            | 9                     | 21.6                         | 0.8                                   |
| P41            | 6                  | 0.02          | N/A           | 0.38    | 138        | 28.7                      | 8                   | 59.4                  | 0.31                   | 3.7                           | 10                             | N/A     | 2.37                    | 1.96                           | 10.09                 | 13.01                        | 1.2                                   |
| P42            | 12.7               | 0.05          | 15.29         | 1.33    | 129        | 23.7                      | 8.2                 | 66.6                  | 0.09                   | 1.2                           | 39.2                           | 36.1    | 1.03                    | 19.03                          | 7.43                  | 16.61                        | 0.5                                   |
| P43            | 19.5               | 0.03          | 7.36          | 0.78    | 125        | 32                        | 7.4                 | 56.3                  | 0.17                   | 4.1                           | 18                             | 37.8    | 2.77                    | 2.69                           | 2.39                  | 18.43                        | 0.9                                   |
| P44            | 24.1               | 0.05          | N/A           | 0.57    | 164        | 30.5                      | 6.9                 | 59.1                  | 0.23                   | 3.2                           | 4                              | 39.2    | 3.32                    | 4.99                           | 2.12                  | 19.81                        | 0.9                                   |
| P45            | 54.8               | 0.14          | 22.05         | 1.38    | 142        | 13                        | 16.3                | 69.4                  | 0.23                   | 0.9                           | N/A                            | N/A     | 3.26                    | 4.58                           | 4.08                  | 12.99                        | 6.4                                   |
| P46            | 39.5               | 0.02          | 20.68         | 0.92    | 141        | 20.64                     | 6.84                | 55.74                 | 1.65                   | 16.74                         | 35                             | 31.1    | 2.62                    | 29.3                           | 18.74                 | 86.41                        | 0.7                                   |
| P47            | 14.7               | N/A           | 7.13          | N/A     | 135        | 24                        | 8.9                 | 58.8                  | 7.7                    | 0.54                          | N/A                            | 35.9    | 1.25                    | 205.6                          | 5.69                  | 14.13                        | 1.3                                   |
| P48            | 215                | N/A           | 217.5         | N/A     | 132        | 10.2                      | 7.3                 | 82.3                  | 0.1                    | 0.01                          | 23                             | 35.1    | 3                       | 2.8                            | 1041                  | 14.78                        | 0.58                                  |
| P49            | 1.01               | N/A           | 2.82          | N/A     | 152        | 36.2                      | 6.4                 | 54.4                  | 2.8                    | 0.17                          | 8                              | 41.6    | 3.66                    | 2.03                           | 1.63                  | 13.83                        | 0.4                                   |
| P50            | 37.1               | 0.02          | 46.73         | N/A     | 135        | 11.9                      | 10.2                | 76.5                  | 0.5                    | 0.04                          | 36                             | 39.15   | 1.13                    | 1000                           | 150.9                 | 37.64                        | 2.4                                   |
| P51            | 40.7               | 0.62          | 27.45         | N/A     | 142        | 15.5                      | 10.1                | 73                    | 0.8                    | 0.05                          | 18                             | 37.3    | 2.79                    | 22.4                           | 9.03                  | 12.46                        | 0.6                                   |

| Patient number | C-reaction protein | Procalcitonin | Interleukin-6 | D dimer | Hemoglobin | Percentage of lymphocytes | Monocyte percentage | Neutrophil percentage | eosinophils percentage | Absolute value of eosinophils | Erythrocyte sedimentation rate | Albumin | Alpha-fetoprotein (AFP) | Carcinoembryonic antigen (CEA) | Cytokeratin -19 (CYF) | Neuron-specific enolase(NSE) | Squamous cell carcinoma antigen (SCC) |
|----------------|--------------------|---------------|---------------|---------|------------|---------------------------|---------------------|-----------------------|------------------------|-------------------------------|--------------------------------|---------|-------------------------|--------------------------------|-----------------------|------------------------------|---------------------------------------|
| P52            | 5                  | N/A           | 4.61          | N/A     | 162        | 24.2                      | 6.3                 | 68.5                  | 1                      | 0.06                          | 2                              | 39.6    | 1.8                     | 4.24                           | 7.2                   | 18.2                         | 0.7                                   |
| P53            | 5                  | N/A           | 7.67          | N/A     | 143        | 32.4                      | 8.6                 | 52.5                  | 6.5                    | 0.44                          | 7                              | 39.1    | 2.97                    | 4.87                           | 3.58                  | 16.38                        | 1.3                                   |
| P54            | 5                  | N/A           | 33.18         | N/A     | 146        | 40.7                      | 6.9                 | 51.3                  | 0.9                    | 0.04                          | 27                             | 45.8    | 2.71                    | 1.62                           | 8.89                  | 12.29                        | 2.6                                   |
| P55            | N/A                | 0.02          | 284.6         | N/A     | 135        | 45.1                      | 6.9                 | 45.5                  | 2.1                    | 0.15                          | N/A                            | 38.7    | N/A                     | N/A                            | N/A                   | N/A                          | N/A                                   |
| P56            | N/A                | N/A           | N/A           | N/A     | 140        | 29                        | 10.5                | 58.7                  | 1.3                    | 0.11                          | N/A                            | 44.6    | 5.65                    | 0.16                           | 1.49                  | 11.61                        | 0.5                                   |
| P57            | N/A                | 0.03          | 27.99         | N/A     | 152        | 33.8                      | 7.1                 | 55.7                  | 3.1                    | 0.24                          | 8                              | 42.8    | 2.53                    | 11.84                          | 3.7                   | 10.2                         | 0.7                                   |
| P58            | N/A                | 0.06          | 7.24          | N/A     | 127        | 40.5                      | 6.8                 | 51.4                  | 1                      | 0.06                          | 9                              | 41.9    | 4.61                    | 1.43                           | 3.1                   | 16.19                        | 0.7                                   |
| P59            | 7.49               | 0.06          | 15.56         | N/A     | 145        | 31.1                      | 8.8                 | 56.5                  | 2.7                    | 0.16                          | 8                              | 36.9    | 4.67                    | 3.45                           | 8.96                  | 15.86                        | 1                                     |
| P60            | 47.7               | 0.12          | 24.18         | N/A     | 127        | 21.1                      | 7.2                 | 70.3                  | 1                      | 0.05                          | 20                             | 34.2    | 4.72                    | 17.25                          | 6.55                  | 18.9                         | 0.9                                   |
| P61            | 14.8               | 0.03          | 4.06          | N/A     | 137        | 26                        | 7.6                 | 63.2                  | 2.6                    | 0.2                           | 18                             | 34.8    | 3.68                    | 13.98                          | 11.7                  | 11.7                         | 0.7                                   |
| P62            | 19.2               | 0.05          | 16.51         | N/A     | 135        | 25.6                      | 10.6                | 58.6                  | 4.5                    | 0.25                          | 34                             | 34.2    | 2.54                    | 0.62                           | 19.52                 | 19.52                        | 17.45                                 |
| P63            | 70.8               | 0.13          | 89.94         | N/A     | 119        | 18.7                      | 10                  | 66.9                  | 3.9                    | 0.48                          | 43                             | 33.54   | 4.22                    | 7.35                           | 7.09                  | 36.82                        | 0.4                                   |
| P64            | 23.5               | 0.02          | 12.66         | N/A     | 171        | 18.6                      | 9.4                 | 69.6                  | 2                      | 0.15                          | 2                              | 36.4    | 2.65                    | 7.52                           | 19.72                 | 23.42                        | 23.42                                 |
| P65            | 1                  | 0.02          | 1.85          | N/A     | 141        | 36.1                      | 8.5                 | 53.2                  | 1.8                    | 0.09                          | 2                              | 40.5    | 2.4                     | 15.64                          | 2.96                  | 18.53                        | 18.53                                 |
| P66            | 2.61               | 0.02          | 25.56         | N/A     | 116        | 30.9                      | 8.6                 | 56.5                  | 3.3                    | 0.18                          | 35                             | 41.7    | 1.7                     | 4.96                           | 3.79                  | 13.94                        | 13.94                                 |
| P67            | 8.5                | 0.04          | 2.94          | N/A     | 136        | 16.1                      | 5.8                 | 76.5                  | 1.3                    | 0.09                          | N/A                            | 43.4    | 2.54                    | 0.45                           | 1.66                  | 14.24                        | 0.8                                   |
| P68            | 5                  | 0.05          | 10.89         | N/A     | 99         | 20.7                      | 11.2                | 65.1                  | 2.6                    | 0.12                          | 29                             | 34.7    | 4.23                    | 5.07                           | 9.76                  | 42.78                        | 3.3                                   |
| P69            | N/A                | 0.02          | 3.7           | N/A     | 132        | 25.7                      | 6                   | 24.9                  | 2.5                    | 0.14                          | 10                             | 40.8    | 2.73                    | 9.57                           | 2.22                  | 15                           | 0.4                                   |
| P70            | 8                  | 0.02          | 19.15         | N/A     | 136        | 28.9                      | 8.5                 | 57                    | 5.2                    | 0.23                          | N/A                            | 38.5    | 2.63                    | 1.75                           | 5.39                  | 25.79                        | 0.6                                   |
| P71            | 8.6                | 0.05          | 6.06          | N/A     | 121        | 22                        | 8.3                 | 64.7                  | 4.4                    | 0.21                          | 19                             | 30.6    | 3.21                    | 1.38                           | 11.2                  | 19.86                        | 20.9                                  |
| P72            | 42.42              | 0.06          | 30.84         | N/A     | 121        | 17                        | 6.9                 | 74.5                  | 1.2                    | 0.08                          | 4                              | 36.8    | 2.67                    | 17.78                          | 47.64                 | 53.34                        | 0.7                                   |
| P73            | N/A                | 0.06          | 2.64          | N/A     | 129        | 37.4                      | 7.2                 | 53.1                  | 1.9                    | 0.1                           | 12                             | 38.2    | 1.81                    | 2.66                           | 4.22                  | 9.46                         | 0.6                                   |
| P74            | 5                  | 0.03          | 5.59          | N/A     | 139        | 34.5                      | 7                   | 57.6                  | 0.8                    | 0.06                          | 27                             | 36      | 5.26                    | 4.27                           | 4.72                  | 15.25                        | 1                                     |
| P75            | 18.5               | 0.02          | 11.41         | N/A     | 121        | 29.4                      | 6                   | 58.6                  | 5.5                    | 0.23                          | 42                             | 35.31   | 2.64                    | 1.44                           | 2.53                  | 25.59                        | 1.1                                   |
| P76            | 37                 | 0.03          | 45.54         | N/A     | 130        | 21.5                      | 9.8                 | 61.7                  | 6                      | 0.43                          | 26                             | 36.4    | 1.88                    | 3.11                           | 13.72                 | 15.01                        | 2.2                                   |
| P77            | 19.7               | 0.04          | 5.31          | N/A     | 121        | 21.2                      | 17.7                | 57.8                  | 2.8                    | 0.17                          | 13                             | 38.13   | 1.98                    | 4.18                           | 3.38                  | 24.33                        | 0.5                                   |
| P78            | 19.1               | 0.03          | 11.74         | 0.85    | 134        | 15.2                      | 7.9                 | 75.8                  | 0.05                   | 0.8                           | N/A                            | 29.9    | 1.08                    | 1.05                           | 11.48                 | 16.49                        | 1.1                                   |
| P79            | N/A                | N/A           | N/A           | 0.39    | 139        | 25.5                      | 6.8                 | 65.5                  | 0.13                   | 1.7                           | 20                             | 33.3    | 3.9                     | 1.51                           | 1.86                  | 17.09                        | 0.7                                   |
| P80            | 43.92              | N/A           | N/A           | 1.24    | 112        | 24.1                      | 8.9                 | 64.6                  | 0.13                   | 1.8                           | 100                            | 29      | 1.22                    | 175.9                          | 3.57                  | 39.44                        | 0.4                                   |
| P81            | 3.21               | N/A           | N/A           | 0.26    | 125        | 34.8                      | 4.8                 | 59.2                  | 0.9                    | 0.06                          | 9                              | 36.2    | N/A                     | N/A                            | N/A                   | N/A                          | N/A                                   |
| P82            | 15.08              | 0.02          | 4.7           | 0.69    | 149        | 20.9                      | 7.7                 | 69.7                  | 0.13                   | 0.3                           | 11                             | 43.6    | 0.43                    | 6.58                           | 3.73                  | 17.5                         | 1.9                                   |
| P83            | 0.7                | N/A           | N/A           | 0.6     | 121        | 26                        | 7.8                 | 665.1                 | 0.05                   | 0.7                           | N/A                            | 44.6    | 6.87                    | 2.38                           | 3.48                  | 13.67                        | 1                                     |
| P84            | 41                 | 0.12          | 22.19         | 0.34    | 129        | 21.6                      | 7                   | 70.3                  | 0.04                   | 0.5                           | 81                             | 33.8    | 1.88                    | 13.84                          | 39.58                 | 21.93                        | 3                                     |
| P85            | 7                  | 0.02          | 5.98          | 0.55    | 155        | 25.2                      | 9.1                 | 63.9                  | 0.06                   | 1                             | 14                             | 57.6    | 3.96                    | 29.09                          | 20.35                 | 30.41                        | 1                                     |
| P86            | 60                 | 0.02          | N/A           | 12.38   | 127        | 5.5                       | 1.6                 | 92.7                  | 0                      | 0.2                           | N/A                            | 39.9    | 2.7                     | 209.2                          | 74.36                 | 28.31                        | 0.3                                   |
| P87            | 5                  | 0.03          | 7.13          | 1.63    | 118        | 40                        | 11.6                | 46.7                  | 1.2                    | 0.5                           | 18                             | 34.9    | 1.5                     | 3.18                           | 2.55                  | 23.49                        | 0.8                                   |
| P88            | 14.4               | 0.02          | 1.67          | 0.6     | 174        | 26.5                      | 7.8                 | 63.1                  | 1.9                    | 0.1                           | 6                              | 40.3    | 4.39                    | 7.51                           | 3.81                  | 22.8                         | 1.1                                   |
| P89            | 38.6               | 0.04          | 33.56         | 2.19    | 129        | 24.7                      | 5.7                 | 65.5                  | 3.7                    | 0.21                          | 48                             | 29.2    | 1.46                    | 72.93                          | 4.43                  | 15.53                        | 0.5                                   |
| P90            | 25.2               | 0.05          | 15.23         | 0.65    | 129        | 27.3                      | 5.4                 | 65.8                  | 1.1                    | 0.11                          | N/A                            | 41.4    | 4.78                    | 2.47                           | 6.04                  | 24.95                        | 0.7                                   |
| P91            | 20.8               | 0.02          | 3.68          | 0.67    | 100        | 39.1                      | 8.6                 | 50                    | 1.8                    | 0.08                          | 32                             | 35.3    | 8.33                    | 3.43                           | 5.69                  | 16.8                         | 0.8                                   |
| P92            | 1.49               | N/A           | N/A           | 0.16    | 133        | 39.9                      | 4.6                 | 54.6                  | 0.9                    | 0.05                          | N/A                            | 38.1    | 4.51                    | 1.37                           | 1.42                  | 12.14                        | 0.9                                   |
| P93            | 24.3               | 0.07          | 57.77         | 24.62   | 136        | 21.4                      | 7.9                 | 66                    | 4.4                    | 0.39                          | 32                             | 42      | 5.24                    | 45.94                          | 26.51                 | 44.95                        | 0.3                                   |
| P94            | 6.1                | 0.1           | N/A           | 0.73    | 106        | 21.8                      | 6.7                 | 70                    | 1.3                    | 0.06                          | 26                             | 42.4    | 1.97                    | 4.06                           | 2.21                  | 11.79                        | 0.8                                   |
| P95            | N/A                | N/A           | N/A           | 1.49    | 133        | 22.3                      | 9.1                 | 67.3                  | 1.2                    | 0.09                          | N/A                            | 35      | 4.01                    | 0.65                           | 1.91                  | 15.24                        | 0.5                                   |

| Patient number | C-reaction protein | Procalcitonin | Interleukin-6 | D dimer | Hemoglobin | Percentage of lymphocytes | Monocyte percentage | Neutrophil percentage | eosinophils percentage | Absolute value of eosinophils | Erythrocyte sedimentation rate | Albumin | Alpha-fetoprotein (AFP) | Carcinoembryonic antigen (CEA) | Cytokeratin -19 (CYF) | Neuron-specific enolase(NSE) | Squamous cell carcinoma antigen (SCC) |
|----------------|--------------------|---------------|---------------|---------|------------|---------------------------|---------------------|-----------------------|------------------------|-------------------------------|--------------------------------|---------|-------------------------|--------------------------------|-----------------------|------------------------------|---------------------------------------|
| P96            | 14.3               | 0.03          | N/A           | 0.87    | 149        | 15                        | 5.8                 | 75.4                  | 3.2                    | 0.23                          | 8                              | 40.55   | 0.61                    | 0.56                           | 4.18                  | 21.66                        | 0.7                                   |
| P97            | 5                  | 0.02          | 5.25          | 3.69    | 123        | 20.5                      | 9.4                 | 69.1                  | 0.5                    | 0.03                          | 13                             | 36.3    | 4.2                     | 34.83                          | 6.2                   | 21.34                        | 0.9                                   |
| P98            | N/A                | N/A           | N/A           | 2.71    | 136        | 16.4                      | 9.3                 | 4.09                  | 1.9                    | 0.11                          | N/A                            | 28.2    | N/A                     | N/A                            | N/A                   | N/A                          | N/A                                   |
| P99            | N/A                | 0.06          | 3.86          | 2.5     | 133        | 28.2                      | 7                   | 62.3                  | 2.3                    | 0.13                          | N/A                            | 41      | 0.61                    | 0.44                           | 2.14                  | 21.32                        | 0.5                                   |
| P100           | N/A                | 0.05          | 39.16         | 1.3     | 127        | 13.5                      | 15.9                | 58.1                  | 2.2                    | 0.19                          | 60                             | 36.5    | 0.61                    | 40.22                          | 6.64                  | 12.99                        | 0.9                                   |
| P101           | N/A                | 0.03          | 3.14          | 0.56    | 139        | 40.7                      | 4.4                 | 53.3                  | 1.3                    | 0.1                           | 8                              | 42      | 4.95                    | 1.48                           | 3.06                  | 22.23                        | 0.6                                   |
| P102           | N/A                | 0.05          | 3.84          | 0.31    | 137        | 35.2                      | 6.1                 | 54.5                  | 4                      | 0.23                          | 10                             | 38.6    | 2.75                    | 2                              | 4.17                  | 19.83                        | 1.9                                   |
| P103           | 6.1                | 0.04          | N/A           | 0.85    | 159        | 22.7                      | 7.5                 | 65.1                  | 1.1                    | 0.29                          | 6                              | 44.4    | 3.32                    | 1.63                           | 16.58                 | 19.1                         | 0.9                                   |
| P104           | 9.7                | 0.03          | 12.72         | 0.87    | 161        | 14.5                      | 8.6                 | 76                    | 0.8                    | 0.08                          | 7                              | 42.4    | 1.29                    | 52.19                          | 4.39                  | 28.31                        | 0.8                                   |
| P105           | 23                 | 0.07          | 12.77         | 0.91    | 157        | 10.06                     | 7.4                 | 77.1                  | 0.27                   | 4.1                           | 16                             | 38.2    | 1.61                    | 3.05                           | 6.81                  | 15.57                        | 1.1                                   |
| P106           | 6.2                | 0.04          | 4.59          | 0.81    | 107        | 8                         | 5.7                 | 86.2                  | 0.06                   | 1.7                           | 20                             | 41.4    | 2.11                    | 43.84                          | 3.88                  | 11.43                        | 0.4                                   |
| P107           | <5                 | 0.02          | 8.8           | 2.02    | 130        | 20.4                      | 5.2                 | 73.81                 | 0.02                   | 0.4                           | 16                             | 36      | 1.2                     | 109.7                          | 9.97                  | 14.47                        | 0.4                                   |
| P108           | 6.27               | 0.02          | 11.59         | 0.79    | 161        | 33.1                      | 6.3                 | 58.1                  | 0.13                   | 2.3                           | 11                             | 41.7    | 2.62                    | 45.68                          | 8.13                  | 18.89                        | 0.5                                   |
| P109           | 2.07               | 0.02          | 12.32         | 0.62    | 171        | 14.8                      | 6.7                 | 77.8                  | 0.05                   | 0.4                           | 7                              | 39.7    | 2.59                    | 134                            | 10.63                 | 16.9                         | 13.6                                  |
| P110           | <5                 | 0.02          | 1.5           | 0.44    | 172        | 26                        | 6.1                 | 65.3                  | 0.22                   | 2.5                           | 1                              | 41.1    | 1.83                    | 9.31                           | 2.21                  | 19.64                        | 0.9                                   |
| P111           | 30.3               | 0.02          | 24.29         | 1.5     | 150        | 13.7                      | 9.3                 | 74.1                  | 0.23                   | 2.5                           | 16                             | 36.2    | 1.67                    | 2.56                           | 8.26                  | 22.79                        | 0.6                                   |
| P112           | 9.7                | 0.23          | 67.61         | 2.28    | 125        | 9.94                      | 11.64               | 78.24                 | 0.02                   | 0.24                          | 44                             | 33.7    | 1.32                    | 2.84                           | 14.41                 | 14.44                        | 1.8                                   |
| P113           | 8.1                | 0.02          | 21.26         | 1.1     | 137        | 31                        | 7.1                 | 56.6                  | 0.21                   | 4.8                           | 38                             | 30.5    | 1.26                    | 4.25                           | 3.53                  | 14.33                        | 0.8                                   |
| P114           | 18.4               | 0.04          | 14.12         | 15.05   | 160        | 14.4                      | 6.1                 | 77.9                  | 0.11                   | 1.2                           | N/A                            | 45.5    | 4.56                    | 10.75                          | 3.76                  | 16.25                        | 0.4                                   |
| P115           | 5                  | 0.02          | 7.25          | 4.46    | 108        | 49.5                      | 6.5                 | 42.7                  | 0.02                   | 0.9                           | 5                              | 37.1    | 2.79                    | 1.61                           | 3.8                   | 11.71                        | 1.1                                   |
| P116           | 35.1               | 0.05          | 23.2          | 2.94    | 141        | 22.9                      | 9.6                 | 65.4                  | 0.13                   | 1.5                           | 7                              | 36      | 5.73                    | 2.3                            | 7.21                  | 22.63                        | 0.7                                   |
| P117           | 5                  | 0.02          | 3.58          | 0.23    | 125        | 31.8                      | 8                   | 51.4                  | 0.31                   | 8.3                           | 14                             | 32.63   | 2.98                    | 3.21                           | 2.25                  | 12.02                        | 0.9                                   |
| P118           | 3.09               | 0.02          | 12.96         | 0.84    | 167        | 21.1                      | 5.6                 | 71.6                  | 0.08                   | 1.1                           | 8                              | 36.3    | 3.94                    | 11.44                          | 1.87                  | 13.43                        | 0.6                                   |
| P119           | 4.76               | 0.02          | 14.68         | 1.01    | 119        | 17.1                      | 7.9                 | 69                    | 0.37                   | 5.4                           | 14                             | 34.8    | 3.12                    | 5.47                           | 2.48                  | 21.57                        | 0.9                                   |
| P120           | 21.9               | 0.04          | 4.56          | 2.16    | 145        | 16.4                      | 9.4                 | 70.4                  | 0.23                   | 3.1                           | 3                              | 40      | 4.44                    | 2.63                           | 5.61                  | 37.15                        | 0.5                                   |
| P121           | 17.9               | 0.04          | 30.4          | 1.19    | 131        | 28                        | 14.4                | 51.4                  | 0.29                   | 5.3                           | 71                             | 34.4    | 1.31                    | 2.54                           | 5.19                  | 17.61                        | 1.1                                   |
| P122           | N/A                | N/A           | N/A           | 1.11    | 134        | 14                        | 7.9                 | 70.6                  | 0.37                   | 6.6                           | 52                             | 36.9    | 4.02                    | 4.99                           | 27.54                 | 21.1                         | 0.8                                   |
| P123           | 12.2               | 0.14          | 16.33         | 2.92    | 118        | 22.5                      | 9                   | 64.4                  | 0.19                   | 3.7                           | 16                             | 28      | 1.08                    | 102.6                          | 4.79                  | 26.43                        | 1.4                                   |
| P124           | 33.6               | 0.09          | N/A           | 0.76    | 133        | 7                         | 3.6                 | 88.9                  | 0.03                   | 0.3                           | 10                             | 42.3    | 3.56                    | 0.76                           | 2.86                  | N/A                          | 0.3                                   |
| P125           | 19                 | 0.02          | N/A           | 9.15    | 113        | 15.4                      | 8.9                 | 73.8                  | 0.14                   | 1.7                           | 34                             | 30.3    | 3.44                    | 59.38                          | 4.96                  | N/A                          | 0.5                                   |
| P126           | 180.4              | 0.16          | N/A           | 2.4     | 89         | 12.3                      | 5.5                 | 81.5                  | 0.07                   | 0.5                           | 79                             | 35.3    | 2.72                    | 27.39                          | 31.31                 | 31.88                        | 0.6                                   |
| P127           | 2.5                | N/A           | N/A           | N/A     | 127        | 32.3                      | 8.3                 | 56.9                  | 2                      | 0.12                          | 12                             | 35.5    | 4.72                    | 3.59                           | 2.57                  | 16.78                        | 0.7                                   |
| P128           | 8.8                | 4.46          | 6.76          | N/A     | 127        | 19.3                      | 12.4                | 64.6                  | 2.7                    | 0.11                          | 46                             | 37.66   | 5.04                    | 138.3                          | 2.1                   | 15.62                        | 0.5                                   |
| P129           | 11.2               | 0.02          | 7.62          | N/A     | 137        | 15.5                      | 6.8                 | 75.3                  | 1.7                    | 0.13                          | 6                              | 35.5    | 2.5                     | 2.38                           | 4.7                   | 16.58                        | 0.6                                   |
| P130           | 14.4               | 0.16          | 25.36         | N/A     | 139        | 28.8                      | 8.7                 | 60.7                  | 1.6                    | 0.1                           | 20                             | 37.5    | 7.61                    | 12.42                          | 8.65                  | 14.63                        | 3.1                                   |
| P131           | 7.3                | 0.02          | 5.87          | N/A     | 137        | 28.4                      | 6.5                 | 62.6                  | 2.1                    | 0.16                          | 59                             | 42.4    | 5.44                    | 56.2                           | 6.26                  | 21.22                        | 0.4                                   |
| P132           | 5                  | 0.5           | 2.25          | 1.32    | 110        | 36                        | 8.1                 | 53.5                  | 0.1                    | 2.2                           | 16                             | 36.4    | 2.4                     | 1.16                           | 2.25                  | 15.23                        | 0.4                                   |
| P133           | 5                  | 0.03          | 2.37          | 0.47    | 140        | 44.3                      | 9.3                 | 43.8                  | 0.24                   | 2.1                           | 12                             | 40.2    | 2.2                     | 1.96                           | 3                     | 14.59                        | 0.6                                   |
| P134           | 5                  | 0.02          | 1.89          | 0.42    | 129        | 38.3                      | 11.5                | 45.2                  | 0.21                   | 3.9                           | 12                             | 61.7    | 2.98                    | 2.11                           | 3.54                  | 13.4                         | 0.4                                   |
| P135           | N/A                | 0.03          | 8.04          | N/A     | 131        | 30.8                      | 9.4                 | 57.7                  | 1.4                    | 0.12                          | 21                             | 39.5    | 4.88                    | 1.91                           | 2.02                  | 16.91                        | 1                                     |
| P136           | 16.2               | 0.02          | 3.97          | 1.45    | 139        | 19.3                      | 7.2                 | 72.2                  | 1                      | 0.07                          | 13                             | 39.5    | 8.77                    | 1.61                           | 57.56                 | 18.74                        | 0.7                                   |
| P137           | 39.6               | 0.08          | 16.25         | N/A     | 140        | 12.6                      | 9.1                 | 74.1                  | 3.5                    | 0.24                          | 16                             | 38.5    | 2.51                    | 1.7                            | 2.79                  | 17.67                        | 0.6                                   |
| P138           | N/A                | N/A           | N/A           | N/A     | 133        | 40.4                      | 21.7                | 30.8                  | 0.15                   | 6.3                           | N/A                            | 33.9    | 3.36                    | 3.96                           | 3.23                  | 14.86                        | 1.2                                   |
| P139           | 20.2               | 0.08          | 10.02         | 37.09   | 129        | 13.2                      | 9.2                 | 72.7                  | 0.32                   | 4.1                           | N/A                            | 36      | 1.86                    | 49.96                          | 7.21                  | 16.06                        | 2                                     |



| Patient number | VC MAX | FVC  | FVC%  | FEV1 | FEV1% | FEV1/FVC  | Notes                                        | COPD treatment                                                                                  |
|----------------|--------|------|-------|------|-------|-----------|----------------------------------------------|-------------------------------------------------------------------------------------------------|
| P1             | N/A    | N/A  | N/A   | N/A  | N/A   | N/A       | The patient with COPD history (FEV1/FVC<0.7) | N/A                                                                                             |
| P2             | N/A    | N/A  | N/A   | N/A  | N/A   | N/A       | The patient with COPD history (FEV1/FVC<0.7) | N/A                                                                                             |
| P3             | N/A    | N/A  | N/A   | N/A  | N/A   | N/A       | The patient with COPD history (FEV1/FVC<0.7) | Budesonide and Formoterol Fumarate                                                              |
| P4             | 72.4   | 3.27 | 75.3  | 2.15 | 64.6  | 0.6574924 |                                              | Beclometasone Pressurised Inhalation+Ipratropium Bromide Solution for Inhalation                |
| P5             | 47.3   | 1.94 | 49    | 1.07 | 34.5  | 0.5515464 |                                              | Salmeterol Fluticasone                                                                          |
| P6             | N/A    | N/A  | N/A   | N/A  | N/A   | N/A       | The patient with COPD history (FEV1/FVC<0.7) | Budesonide+Acetylcysteine                                                                       |
| P7             | N/A    | N/A  | N/A   | N/A  | N/A   | N/A       | The patient with COPD history (FEV1/FVC<0.7) | N/A                                                                                             |
| P8             | N/A    | N/A  | N/A   | N/A  | N/A   | N/A       | The patient with COPD history (FEV1/FVC<0.7) | Acetylcysteine+Ipratropium Bromide Solution for Inhalation                                      |
| P9             | 1.91   | 60   | 0.99  | 41.2 | 51.68 | 0.6866667 |                                              | Salmeterol Xinafoate and Fluticasone Propionate +Indacaterol Maleate and Glycopyrronium Bromide |
| P10            | N/A    | N/A  | N/A   | N/A  | N/A   | N/A       | The patient with COPD history (FEV1/FVC<0.7) | N/A                                                                                             |
| P11            | N/A    | N/A  | N/A   | N/A  | N/A   | N/A       | The patient with COPD history (FEV1/FVC<0.7) | Salmeterol Xinafoate and Fluticasone Propionate                                                 |
| P12            | N/A    | N/A  | N/A   | N/A  | N/A   | N/A       | The patient with COPD history (FEV1/FVC<0.7) | N/A                                                                                             |
| P13            | N/A    | N/A  | N/A   | N/A  | N/A   | N/A       | The patient with COPD history (FEV1/FVC<0.7) | N/A                                                                                             |
| P14            | N/A    | N/A  | N/A   | N/A  | N/A   | N/A       | The patient with COPD history (FEV1/FVC<0.7) | N/A                                                                                             |
| P15            | 91.6   | 3.46 | 94.9  | 2.33 | 81.8  | 0.6734104 |                                              | Salmeterol Xinafoate and Fluticasone Propionate                                                 |
| P16            | N/A    | N/A  | N/A   | N/A  | N/A   | N/A       | The patient with COPD history (FEV1/FVC<0.7) | N/A                                                                                             |
| P17            | N/A    | N/A  | N/A   | N/A  | N/A   | N/A       | The patient with COPD history (FEV1/FVC<0.7) | N/A                                                                                             |
| P18            | 125.1  | 1.59 | 136   | 0.87 | 74.5  | 0.5471698 |                                              | N/A                                                                                             |
| P19            | N/A    | N/A  | N/A   | N/A  | N/A   | N/A       | The patient with COPD history (FEV1/FVC<0.7) | N/A                                                                                             |
| P20            | 2.47   | 92.4 | 1.13  | 56.7 | 45.89 | 0.6136364 |                                              | Salmeterol Xinafoate and Fluticasone Propionate                                                 |
| P21            | N/A    | N/A  | N/A   | N/A  | N/A   | N/A       | The patient with COPD history (FEV1/FVC<0.7) | Tiotropium Bromide                                                                              |
| P22            | N/A    | N/A  | N/A   | N/A  | N/A   | N/A       | The patient with COPD history (FEV1/FVC<0.7) | N/A                                                                                             |
| P23            | 72.7   | 2.79 | 73.5  | 1.35 | 47.5  | 0.483871  |                                              | Umeclidinium Bromide and Vilanterol Trifenatate                                                 |
| P24            | 75.5   | 1.62 | 44.8  | 0.86 | 32.5  | 0.5308642 |                                              | Salmeterol Xinafoate and Fluticasone Propionate                                                 |
| P25            | 97.3   | 4.13 | 101   | 2.39 | 76.1  | 0.5786925 |                                              | UTIBRON NEOHALER                                                                                |
| P26            | 93.2   | 3.12 | 96.2  | 1.9  | 77.2  | 0.6089744 |                                              | Umeclidinium Bromide and Vilanterol Trifenatate                                                 |
| P27            | N/A    | N/A  | N/A   | N/A  | N/A   | N/A       | The patient with COPD history (FEV1/FVC<0.7) | N/A                                                                                             |
| P28            | N/A    | N/A  | N/A   | N/A  | N/A   | N/A       | The patient with COPD history (FEV1/FVC<0.7) | N/A                                                                                             |
| P29            | 79.4   | 1.54 | 72    | 1.02 | 57.9  | 0.6623377 |                                              | N/A                                                                                             |
| P30            | 66     | 2.64 | 66.6  | 1.55 | 49    | 0.5871212 |                                              | Indacaterol Maleate and Glycopyrronium Bromide                                                  |
| P31            | 104.5  | 3.15 | 107.5 | 2.11 | 95.2  | 0.6698413 |                                              | N/A                                                                                             |
| P32            | 87.8   | 3.56 | 90.9  | 2.44 | 83.3  | 0.6853933 |                                              | N/A                                                                                             |
| P33            | N/A    | N/A  | N/A   | N/A  | N/A   | N/A       | The patient with COPD history (FEV1/FVC<0.7) | SALMETEROL Fluticasone                                                                          |
| P34            | N/A    | N/A  | N/A   | N/A  | N/A   | N/A       | The patient with COPD history (FEV1/FVC<0.7) | N/A                                                                                             |
| P35            | 71.8   | 2.14 | 67.2  | 1.39 | 57.6  | 0.6495327 |                                              | Umeclidinium Bromide and Vilanterol Trifenatate                                                 |
| P36            | N/A    | N/A  | N/A   | N/A  | N/A   | N/A       | The patient with COPD history (FEV1/FVC<0.7) | N/A                                                                                             |
| P37            | N/A    | N/A  | N/A   | N/A  | N/A   | N/A       | The patient with COPD history (FEV1/FVC<0.7) | N/A                                                                                             |
| P38            | N/A    | N/A  | N/A   | N/A  | N/A   | N/A       | The patient with COPD history (FEV1/FVC<0.7) | Budesonide and Formoterol Fumarate                                                              |
| P39            | N/A    | N/A  | N/A   | N/A  | N/A   | N/A       | The patient with COPD history (FEV1/FVC<0.7) | Spirivaspincap                                                                                  |
| P40            | N/A    | N/A  | N/A   | N/A  | N/A   | N/A       | The patient with COPD history (FEV1/FVC<0.7) | N/A                                                                                             |
| P41            | N/A    | N/A  | N/A   | N/A  | N/A   | N/A       | The patient with COPD history (FEV1/FVC<0.7) | N/A                                                                                             |
| P42            | 101.1  | 2.38 | 107.1 | 1.47 | 80.6  | 0.6176471 |                                              | Spirivaspincap                                                                                  |
| P43            | 40.8   | 1.54 | 42.3  | 0.87 | 30.5  | 0.5649351 |                                              | Salbutamol Sulphate Aerosol+Spirivaspincap                                                      |
| P44            | N/A    | N/A  | N/A   | N/A  | N/A   | N/A       | The patient with COPD history (FEV1/FVC<0.7) | N/A                                                                                             |
| P45            | 84     | 3.07 | 85.6  | 1.66 | 63.2  | 0.5407166 |                                              | N/A                                                                                             |
| P46            | N/A    | N/A  | N/A   | N/A  | N/A   | N/A       | The patient with COPD history (FEV1/FVC<0.7) | Budesonide and Formoterol Fumarate                                                              |
| P47            | N/A    | N/A  | N/A   | N/A  | N/A   | N/A       | The patient with COPD history (FEV1/FVC<0.7) | Spirivaspincap                                                                                  |
| P48            | N/A    | N/A  | N/A   | N/A  | N/A   | N/A       | The patient with COPD history (FEV1/FVC<0.7) | Budesonide and Formoterol Fumarate                                                              |
| P49            | 105.8  | 4.43 | 109.9 | 2.84 | 88.9  | 0.6410835 |                                              | N/A                                                                                             |
| P50            | 47.4   | 1.85 | 47.8  | 1.18 | 38.9  | 0.6378378 |                                              | N/A                                                                                             |
| P51            | 81.9   | 3.06 | 84.8  | 1.7  | 61.4  | 0.5555556 |                                              | N/A                                                                                             |

| Patient number | VC MAX | FVC  | FVC%  | FEV1 | FEV1% | FEV1/FVC  | Notes                       | COPD treatment |
|----------------|--------|------|-------|------|-------|-----------|-----------------------------|----------------|
| P52            | 101.2  | 4.43 | 102.6 | 3.51 | 99.9  | 0.7923251 | The patient no COPD history | N/A            |
| P53            | N/A    | N/A  | N/A   | N/A  | N/A   | N/A       | The patient no COPD history | N/A            |
| P54            | 83.6   | 4.46 | 85    | 3.54 | 80.8  | 0.793722  | The patient no COPD history | N/A            |
| P55            | 107.1  | 1.83 | 114.1 | 1.47 | 94.2  | 0.8032787 | The patient no COPD history | N/A            |
| P56            | N/A    | N/A  | N/A   | N/A  | N/A   | N/A       | The patient no COPD history | N/A            |
| P57            | N/A    | N/A  | N/A   | N/A  | N/A   | N/A       | The patient no COPD history | N/A            |
| P58            | 123.5  | 3.15 | 127   | 2.68 | 127.9 | 0.8507937 | The patient no COPD history | N/A            |
| P59            | 79.9   | 3.27 | 82.9  | 2.36 | 75.3  | 0.7217125 | The patient no COPD history | N/A            |
| P60            | N/A    | N/A  | N/A   | N/A  | N/A   | N/A       | The patient no COPD history | N/A            |
| P61            | 73.5   | 3.23 | 76    | 2.35 | 73.2  | 0.7275542 | The patient no COPD history | N/A            |
| P62            | N/A    | N/A  | N/A   | N/A  | N/A   | N/A       | The patient no COPD history | N/A            |
| P63            | 76.92  | 2.16 | 81.8  | 1.68 | 75.84 | 0.7777778 | The patient no COPD history | N/A            |
| P64            | N/A    | N/A  | N/A   | N/A  | N/A   | N/A       | The patient no COPD history | N/A            |
| P65            | N/A    | N/A  | N/A   | N/A  | N/A   | N/A       | The patient no COPD history | N/A            |
| P66            | 66.2   | 1.53 | 69.9  | 1.27 | 70.7  | 0.8300654 | The patient no COPD history | N/A            |
| P67            | N/A    | N/A  | N/A   | N/A  | N/A   | N/A       | The patient no COPD history | N/A            |
| P68            | N/A    | N/A  | N/A   | N/A  | N/A   | N/A       | The patient no COPD history | N/A            |
| P69            | N/A    | N/A  | N/A   | N/A  | N/A   | N/A       | The patient no COPD history | N/A            |
| P70            | N/A    | N/A  | N/A   | N/A  | N/A   | N/A       | The patient no COPD history | N/A            |
| P71            | N/A    | N/A  | N/A   | N/A  | N/A   | N/A       | The patient no COPD history | N/A            |
| P72            | N/A    | N/A  | N/A   | N/A  | N/A   | N/A       | The patient no COPD history | N/A            |
| P73            | N/A    | N/A  | N/A   | N/A  | N/A   | N/A       | The patient no COPD history | N/A            |
| P74            | 120.3  | 4.68 | 123.1 | 3.49 | 119   | 0.7457265 | The patient no COPD history | N/A            |
| P75            | 142.4  | 3.37 | 143.9 | 2.71 | 139.7 | 0.8041543 | The patient no COPD history | N/A            |
| P76            | N/A    | N/A  | N/A   | N/A  | N/A   | N/A       | The patient no COPD history | N/A            |
| P77            | N/A    | N/A  | N/A   | N/A  | N/A   | N/A       | The patient no COPD history | N/A            |
| P78            | N/A    | N/A  | N/A   | N/A  | N/A   | N/A       | The patient no COPD history | N/A            |
| P79            | N/A    | N/A  | N/A   | N/A  | N/A   | N/A       | The patient no COPD history | N/A            |
| P80            | N/A    | N/A  | N/A   | N/A  | N/A   | N/A       | The patient no COPD history | N/A            |
| P81            | N/A    | N/A  | N/A   | N/A  | N/A   | N/A       | The patient no COPD history | N/A            |
| P82            | N/A    | N/A  | N/A   | N/A  | N/A   | N/A       | The patient no COPD history | N/A            |
| P83            | 92.6   | 1.96 | 98.1  | 1.44 | 88.8  | 0.7346939 | The patient no COPD history | N/A            |
| P84            | N/A    | N/A  | N/A   | N/A  | N/A   | N/A       | The patient no COPD history | N/A            |
| P85            | N/A    | N/A  | N/A   | N/A  | N/A   | N/A       | The patient no COPD history | N/A            |
| P86            | N/A    | N/A  | N/A   | N/A  | N/A   | N/A       | The patient no COPD history | N/A            |
| P87            | 131.9  | 2.7  | 130.5 | 1.99 | 117.8 | 0.737037  | The patient no COPD history | N/A            |
| P88            | N/A    | N/A  | N/A   | N/A  | N/A   | N/A       | The patient no COPD history | N/A            |
| P89            | N/A    | N/A  | N/A   | N/A  | N/A   | N/A       | The patient no COPD history | N/A            |
| P90            | N/A    | N/A  | N/A   | N/A  | N/A   | N/A       | The patient no COPD history | N/A            |
| P91            | N/A    | N/A  | N/A   | N/A  | N/A   | N/A       | The patient no COPD history | N/A            |
| P92            | 79.4   | 1.84 | 81.9  | 1.61 | 86    | 0.875     | The patient no COPD history | N/A            |
| P93            | N/A    | N/A  | N/A   | N/A  | N/A   | N/A       | The patient no COPD history | N/A            |
| P94            | N/A    | N/A  | N/A   | N/A  | N/A   | N/A       | The patient no COPD history | N/A            |
| P95            | 109.2  | 2.79 | 112.6 | 2.14 | 102.7 | 0.7670251 | The patient no COPD history | N/A            |

| Patient number | VC MAX | FVC  | FVC%  | FEV1 | FEV1% | FEV1/FVC  | Notes                       | COPD treatment |
|----------------|--------|------|-------|------|-------|-----------|-----------------------------|----------------|
| P96            | N/A    | N/A  | N/A   | N/A  | N/A   | N/A       | The patient no COPD history | N/A            |
| P97            | N/A    | N/A  | N/A   | N/A  | N/A   | N/A       | The patient no COPD history | N/A            |
| P98            | 88.4   | 2.97 | 91.2  | 2.48 | 102   | 0.8350168 | The patient no COPD history | N/A            |
| P99            | N/A    | N/A  | N/A   | N/A  | N/A   | N/A       | The patient no COPD history | N/A            |
| P100           | 99.6   | 3.37 | 97.7  | 2.73 | 105.5 | 0.810089  | The patient no COPD history | N/A            |
| P101           | 66.4   | 2.26 | 65.6  | 1.73 | 58.6  | 0.7654867 | The patient no COPD history | N/A            |
| P102           | 85.5   | 2.19 | 86.4  | 1.72 | 81.2  | 0.7853881 | The patient no COPD history | N/A            |
| P103           | N/A    | N/A  | N/A   | N/A  | N/A   | N/A       | The patient no COPD history | N/A            |
| P104           | 92.8   | 2.42 | 93.9  | 1.72 | 92.9  | 0.7107438 | The patient no COPD history | N/A            |
| P105           | N/A    | 3.08 | 71.9  | 4.61 | 65.2  | 1.4967532 | The patient no COPD history | N/A            |
| P106           | N/A    | N/A  | N/A   | N/A  | N/A   | N/A       | The patient no COPD history | N/A            |
| P107           | N/A    | N/A  | N/A   | N/A  | N/A   | N/A       | The patient no COPD history | N/A            |
| P108           | N/A    | N/A  | N/A   | N/A  | N/A   | N/A       | The patient no COPD history | N/A            |
| P109           | N/A    | N/A  | N/A   | N/A  | N/A   | N/A       | The patient no COPD history | N/A            |
| P110           | N/A    | N/A  | N/A   | N/A  | N/A   | N/A       | The patient no COPD history | N/A            |
| P111           | N/A    | N/A  | N/A   | N/A  | N/A   | N/A       | The patient no COPD history | N/A            |
| P112           | N/A    | N/A  | N/A   | N/A  | N/A   | N/A       | The patient no COPD history | N/A            |
| P113           | N/A    | N/A  | N/A   | N/A  | N/A   | N/A       | The patient no COPD history | N/A            |
| P114           | N/A    | N/A  | N/A   | N/A  | N/A   | N/A       | The patient no COPD history | N/A            |
| P115           | N/A    | N/A  | N/A   | N/A  | N/A   | N/A       | The patient no COPD history | N/A            |
| P116           | 90.7   | 4.08 | 94.4  | 3.08 | 87.7  | 0.754902  | The patient no COPD history | N/A            |
| P117           | N/A    | N/A  | N/A   | N/A  | N/A   | N/A       | The patient no COPD history | N/A            |
| P118           | N/A    | N/A  | N/A   | N/A  | N/A   | N/A       | The patient no COPD history | N/A            |
| P119           | N/A    | N/A  | N/A   | N/A  | N/A   | N/A       | The patient no COPD history | N/A            |
| P120           | 99.8   | 4.86 | 100.8 | 3.6  | 89.3  | 0.7407407 | The patient no COPD history | N/A            |
| P121           | N/A    | N/A  | N/A   | N/A  | N/A   | N/A       | The patient no COPD history | N/A            |
| P122           | N/A    | N/A  | N/A   | N/A  | N/A   | N/A       | The patient no COPD history | N/A            |
| P123           | N/A    | N/A  | N/A   | N/A  | N/A   | N/A       | The patient no COPD history | N/A            |
| P124           | N/A    | N/A  | N/A   | N/A  | N/A   | N/A       | The patient no COPD history | N/A            |
| P125           | N/A    | N/A  | N/A   | N/A  | N/A   | N/A       | The patient no COPD history | N/A            |
| P126           | N/A    | N/A  | N/A   | N/A  | N/A   | N/A       | The patient no COPD history | N/A            |
| P127           | N/A    | N/A  | N/A   | N/A  | N/A   | N/A       | The patient no COPD history | N/A            |
| P128           | N/A    | N/A  | N/A   | N/A  | N/A   | N/A       | The patient no COPD history | N/A            |
| P129           | N/A    | N/A  | N/A   | N/A  | N/A   | N/A       | The patient no COPD history | N/A            |
| P130           | N/A    | N/A  | N/A   | N/A  | N/A   | N/A       | The patient no COPD history | N/A            |
| P131           | N/A    | N/A  | N/A   | N/A  | N/A   | N/A       | The patient no COPD history | N/A            |
| P132           | 107.3  | 2.63 | 112   | 2.08 | 106.6 | 0.7908745 | The patient no COPD history | N/A            |
| P133           | 99.7   | 3.07 | 101.9 | 2.28 | 88.8  | 0.742671  | The patient no COPD history | N/A            |
| P134           | N/A    | N/A  | N/A   | N/A  | N/A   | N/A       | The patient no COPD history | N/A            |
| P135           | 92.8   | 2.75 | 94.1  | 2.29 | 91.9  | 0.8327273 | The patient no COPD history | N/A            |
| P136           | N/A    | N/A  | N/A   | N/A  | N/A   | N/A       | The patient no COPD history | N/A            |
| P137           | N/A    | N/A  | N/A   | N/A  | N/A   | N/A       | The patient no COPD history | N/A            |
| P138           | 94.4   | 3.88 | 97.9  | 2.79 | 99.8  | 0.7190722 | The patient no COPD history | N/A            |
| P139           | N/A    | N/A  | N/A   | N/A  | N/A   | N/A       | The patient no COPD history | N/A            |

Note: N/A means not available

**Supplementary Table S2.** Comparison of serum markers and tumor markers between COPD-LC and Non-COPD-LC in Chinese cohort

| Characteristics                                                  | COPD-LC            | non-COPD-LC       | <i>P</i> value  |
|------------------------------------------------------------------|--------------------|-------------------|-----------------|
| Serum markers                                                    |                    |                   |                 |
| C-reaction protein level(mg/L), median [IQR]                     | 21.8[6.00-54.8]    | 9.70[5.00-21.1]   | <i>P</i> =0.007 |
| Albumin level(g/L), median [IQR]                                 | 36.0[32.8-41.0]    | 37.6[35.2-38.9]   | <i>P</i> =0.018 |
| Monocyte percentage (%), median [IQR]                            | 8.55[7.32-10.0]    | 7.85[6.65-9.12]   | <i>P</i> =0.028 |
| Procalcitonin level (pg/mL), median [IQR]                        | 0.050[0.030-0.075] | 0.03[0.020-0.060] | <i>P</i> =0.055 |
| Interleukin-6 level (pg/mL), median [IQR]                        | 15.9[6.40-29.7]    | 10.4[4.59-20.7]   | <i>P</i> =0.074 |
| D dimer level (μg/mL), median [IQR]                              | 0.890[0.682-1.39]  | 0.960[0.627-2.18] | <i>P</i> =0.751 |
| Hemoglobin level (g/L), median [IQR]                             | 136[122-143]       | 133[125-140]      | <i>P</i> =0.746 |
| Percentage of lymphocytes (%), median [IQR]                      | 21.6[13.6-30.0]    | 24.1[17.1-31.2]   | <i>P</i> =0.109 |
| Neutrophil percentage (%), median [IQR]                          | 67.2[57.5-74.0]    | 64.6[56.5-70.8]   | <i>P</i> =0.166 |
| Absolute value of eosinophils (10 <sup>9</sup> /L), median [IQR] | 0.470[0.100-2.27]  | 0.230[0.110-1.12] | <i>P</i> =0.706 |
| Erythrocyte sedimentation rate (%), median [IQR]                 | 15.0[10.0-27.7]    | 16[8.00-29.0]     | <i>P</i> =0.926 |
| Tumor markers                                                    |                    |                   |                 |
| AFP level (ng/mL), median [IQR]                                  | 2.37[1.66-3.32]    | 2.72[1.88-4.23]   | <i>P</i> =0.119 |
| CEA level (ng/mL), median [IQR]                                  | 3.80[2.75-11.9]    | 4.12[1.95-14.4]   | <i>P</i> =0.514 |
| CYF level (ng/mL), median [IQR]                                  | 9.81[3.22-11.7]    | 4.43[3.00-8.65]   | <i>P</i> =0.091 |
| CSE level (ng/mL), median [IQR]                                  | 16.9[14.9-21.2]    | 17.1[14.7-22.1]   | <i>P</i> =0.947 |
| SCC level (ng/mL), median [IQR]                                  | 1.25[0.725-2.40]   | 0.800[0.600-1.10] | <i>P</i> <0.001 |

**Supplementary Table S3.** Clinicopathological characteristics of TCGA cohort.

| Characteristic          | COPD-LC<br>No.of patients(%) | non-COPD-LC<br>No.of patients(%) | P value         |
|-------------------------|------------------------------|----------------------------------|-----------------|
| Total of patients       | 69(100)                      | 126(100)                         |                 |
| Age (yr)                |                              |                                  | <i>P</i> =0.684 |
| Mean±SD                 | 66.68±8.8                    | 65.85±2.83                       |                 |
| Sex-no. (%)             |                              |                                  | <i>P</i> =0.383 |
| Female                  | 30(43)                       | 63(50)                           |                 |
| Male                    | 39(57)                       | 63(50)                           |                 |
| Pathology-no. (%)       |                              |                                  |                 |
| Adenocarcinoma          | 29(42)                       | 85(67)                           | <i>P</i> =0.001 |
| Squamous-cell carcinoma | 40(58)                       | 41(33)                           |                 |
| Stage-no. (%)           |                              |                                  | <i>P</i> =0.154 |
| I                       | 40(58)                       | 81(64)                           |                 |
| II                      | 16(23)                       | 32(25)                           |                 |
| III                     | 10(15)                       | 13(11)                           |                 |
| IV                      | 1(1)                         | 0(0)                             |                 |
| NA                      | 2(3)                         | 0(0)                             |                 |
| Smoking history-no. (%) |                              |                                  |                 |
| Yes                     | 69(100)                      | 117(93)                          | <i>P</i> =0.028 |
| No                      | 0(0)                         | 9(7)                             |                 |

**Supplementary Table S4.** The mutation frequency and Fisher's exact test of 539 genes between COPD-LC and non-COPD-LC in our Chinese cohort

| Gene    | COPD_Mut | COPD_Wildtype | nonCOPD_Mut | nonCOPD_Wildtype | COPD Freq(%) | nonCOPD Freq(%) | P-value     |
|---------|----------|---------------|-------------|------------------|--------------|-----------------|-------------|
| TP53    | 15       | 6             | 33          | 35               | 71.42857143  | 48.52941176     | 0.082176702 |
| LRP1B   | 9        | 12            | 6           | 62               | 42.85714286  | 8.823529412     | 0.000947273 |
| MUC16   | 7        | 14            | 17          | 51               | 33.33333333  | 25              | 0.574342966 |
| EPHA5   | 5        | 16            | 1           | 67               | 23.80952381  | 1.470588235     | 0.00247458  |
| EGFR    | 4        | 17            | 34          | 34               | 19.04761905  | 50              | 0.013060973 |
| RBM10   | 4        | 17            | 5           | 63               | 19.04761905  | 7.352941176     | 0.206471478 |
| FAT1    | 3        | 18            | 0           | 68               | 14.28571429  | 0               | 0.011711458 |
| PREX2   | 3        | 18            | 0           | 68               | 14.28571429  | 0               | 0.011711458 |
| PDGFRA  | 3        | 18            | 0           | 68               | 14.28571429  | 0               | 0.011711458 |
| MET     | 3        | 18            | 0           | 68               | 14.28571429  | 0               | 0.011711458 |
| PRKDC   | 3        | 18            | 1           | 67               | 14.28571429  | 1.470588235     | 0.039492125 |
| MSH6    | 3        | 18            | 2           | 66               | 14.28571429  | 2.941176471     | 0.083287531 |
| PIK3C2B | 3        | 18            | 2           | 66               | 14.28571429  | 2.941176471     | 0.083287531 |
| ATR     | 3        | 18            | 2           | 66               | 14.28571429  | 2.941176471     | 0.083287531 |
| SPTA1   | 3        | 18            | 2           | 66               | 14.28571429  | 2.941176471     | 0.083287531 |
| ERBB4   | 3        | 18            | 3           | 65               | 14.28571429  | 4.411764706     | 0.140638656 |
| FAT3    | 3        | 18            | 3           | 65               | 14.28571429  | 4.411764706     | 0.140638656 |
| CREBBP  | 3        | 18            | 5           | 63               | 14.28571429  | 7.352941176     | 0.38628858  |
| EPHA3   | 2        | 19            | 0           | 68               | 9.523809524  | 0               | 0.053626149 |
| IL7R    | 2        | 19            | 0           | 68               | 9.523809524  | 0               | 0.053626149 |
| PTPRB   | 2        | 19            | 0           | 68               | 9.523809524  | 0               | 0.053626149 |
| FGF14   | 2        | 19            | 0           | 68               | 9.523809524  | 0               | 0.053626149 |
| CUL4A   | 2        | 19            | 0           | 68               | 9.523809524  | 0               | 0.053626149 |
| ERCC2   | 2        | 19            | 0           | 68               | 9.523809524  | 0               | 0.053626149 |
| RAD50   | 2        | 19            | 0           | 68               | 9.523809524  | 0               | 0.053626149 |
| SMARCA4 | 2        | 19            | 0           | 68               | 9.523809524  | 0               | 0.053626149 |
| EP300   | 2        | 19            | 0           | 68               | 9.523809524  | 0               | 0.053626149 |
| PPARG   | 2        | 19            | 0           | 68               | 9.523809524  | 0               | 0.053626149 |
| TGFBR2  | 2        | 19            | 0           | 68               | 9.523809524  | 0               | 0.053626149 |
| NOTCH4  | 2        | 19            | 0           | 68               | 9.523809524  | 0               | 0.053626149 |
| SMARCC1 | 2        | 19            | 0           | 68               | 9.523809524  | 0               | 0.053626149 |
| TET2    | 2        | 19            | 0           | 68               | 9.523809524  | 0               | 0.053626149 |
| BRCA1   | 2        | 19            | 1           | 67               | 9.523809524  | 1.470588235     | 0.137455532 |
| MTOR    | 2        | 19            | 1           | 67               | 9.523809524  | 1.470588235     | 0.137455532 |
| KDM5A   | 2        | 19            | 1           | 67               | 9.523809524  | 1.470588235     | 0.137455532 |
| ROS1    | 2        | 19            | 1           | 67               | 9.523809524  | 1.470588235     | 0.137455532 |
| STAT6   | 2        | 19            | 1           | 67               | 9.523809524  | 1.470588235     | 0.137455532 |
| JAK3    | 2        | 19            | 1           | 67               | 9.523809524  | 1.470588235     | 0.137455532 |
| STK11   | 2        | 19            | 1           | 67               | 9.523809524  | 1.470588235     | 0.137455532 |
| NOTCH2  | 2        | 19            | 1           | 67               | 9.523809524  | 1.470588235     | 0.137455532 |
| SMARCA2 | 2        | 19            | 2           | 66               | 9.523809524  | 2.941176471     | 0.235418938 |
| IGFN1   | 2        | 19            | 2           | 66               | 9.523809524  | 2.941176471     | 0.235418938 |
| NFE2L2  | 2        | 19            | 2           | 66               | 9.523809524  | 2.941176471     | 0.235418938 |
| ARID1A  | 2        | 19            | 2           | 66               | 9.523809524  | 2.941176471     | 0.235418938 |
| ALK     | 2        | 19            | 2           | 66               | 9.523809524  | 2.941176471     | 0.235418938 |
| NOTCH3  | 2        | 19            | 2           | 66               | 9.523809524  | 2.941176471     | 0.235418938 |
| SETD2   | 2        | 19            | 2           | 66               | 9.523809524  | 2.941176471     | 0.235418938 |
| KEAP1   | 2        | 19            | 3           | 65               | 9.523809524  | 4.411764706     | 0.587977438 |
| IRS2    | 2        | 19            | 3           | 65               | 9.523809524  | 4.411764706     | 0.587977438 |
| FAT2    | 2        | 19            | 3           | 65               | 9.523809524  | 4.411764706     | 0.587977438 |
| RB1     | 2        | 19            | 3           | 65               | 9.523809524  | 4.411764706     | 0.587977438 |
| POLE    | 2        | 19            | 3           | 65               | 9.523809524  | 4.411764706     | 0.587977438 |
| BRCA2   | 2        | 19            | 3           | 65               | 9.523809524  | 4.411764706     | 0.587977438 |
| GRIN2A  | 2        | 19            | 3           | 65               | 9.523809524  | 4.411764706     | 0.587977438 |
| PIK3CA  | 2        | 19            | 7           | 61               | 9.523809524  | 10.29411765     | 1           |
| FUBP1   | 1        | 20            | 0           | 68               | 4.761904762  | 0               | 0.235955056 |
| EPAS1   | 1        | 20            | 0           | 68               | 4.761904762  | 0               | 0.235955056 |
| KIT     | 1        | 20            | 0           | 68               | 4.761904762  | 0               | 0.235955056 |
| HGF     | 1        | 20            | 0           | 68               | 4.761904762  | 0               | 0.235955056 |
| FOXO1   | 1        | 20            | 0           | 68               | 4.761904762  | 0               | 0.235955056 |
| AXL     | 1        | 20            | 0           | 68               | 4.761904762  | 0               | 0.235955056 |
| NT5C2   | 1        | 20            | 0           | 68               | 4.761904762  | 0               | 0.235955056 |
| BRIP1   | 1        | 20            | 0           | 68               | 4.761904762  | 0               | 0.235955056 |
| EML4    | 1        | 20            | 0           | 68               | 4.761904762  | 0               | 0.235955056 |
| RAC1    | 1        | 20            | 0           | 68               | 4.761904762  | 0               | 0.235955056 |
| TEK     | 1        | 20            | 0           | 68               | 4.761904762  | 0               | 0.235955056 |
| PITCH1  | 1        | 20            | 0           | 68               | 4.761904762  | 0               | 0.235955056 |
| ARID5B  | 1        | 20            | 0           | 68               | 4.761904762  | 0               | 0.235955056 |
| CIITA   | 1        | 20            | 0           | 68               | 4.761904762  | 0               | 0.235955056 |

| Gene    | COPD_Mut | COPD_Wildtype | nonCOPD_Mut | nonCOPD_Wildtype | COPD Freq(%) | nonCOPD Freq(%) | P-value     |
|---------|----------|---------------|-------------|------------------|--------------|-----------------|-------------|
| SPEN    | 1        | 20            | 0           | 68               | 4.761904762  | 0               | 0.235955056 |
| CHD4    | 1        | 20            | 0           | 68               | 4.761904762  | 0               | 0.235955056 |
| CYP19A1 | 1        | 20            | 0           | 68               | 4.761904762  | 0               | 0.235955056 |
| CYLD    | 1        | 20            | 0           | 68               | 4.761904762  | 0               | 0.235955056 |
| RAD51C  | 1        | 20            | 0           | 68               | 4.761904762  | 0               | 0.235955056 |
| RUNX1   | 1        | 20            | 0           | 68               | 4.761904762  | 0               | 0.235955056 |
| FOXP1   | 1        | 20            | 0           | 68               | 4.761904762  | 0               | 0.235955056 |
| FGFR4   | 1        | 20            | 0           | 68               | 4.761904762  | 0               | 0.235955056 |
| GNAQ    | 1        | 20            | 0           | 68               | 4.761904762  | 0               | 0.235955056 |
| PIGR    | 1        | 20            | 0           | 68               | 4.761904762  | 0               | 0.235955056 |
| PTPRO   | 1        | 20            | 0           | 68               | 4.761904762  | 0               | 0.235955056 |
| MPL     | 1        | 20            | 0           | 68               | 4.761904762  | 0               | 0.235955056 |
| FGA     | 1        | 20            | 0           | 68               | 4.761904762  | 0               | 0.235955056 |
| EXT1    | 1        | 20            | 0           | 68               | 4.761904762  | 0               | 0.235955056 |
| MUTYH   | 1        | 20            | 0           | 68               | 4.761904762  | 0               | 0.235955056 |
| CBFB    | 1        | 20            | 0           | 68               | 4.761904762  | 0               | 0.235955056 |
| CYP2E1  | 1        | 20            | 0           | 68               | 4.761904762  | 0               | 0.235955056 |
| FGF6    | 1        | 20            | 0           | 68               | 4.761904762  | 0               | 0.235955056 |
| DICER1  | 1        | 20            | 0           | 68               | 4.761904762  | 0               | 0.235955056 |
| SDHD    | 1        | 20            | 0           | 68               | 4.761904762  | 0               | 0.235955056 |
| TSC2    | 1        | 20            | 0           | 68               | 4.761904762  | 0               | 0.235955056 |
| SPOP    | 1        | 20            | 0           | 68               | 4.761904762  | 0               | 0.235955056 |
| AURKB   | 1        | 20            | 0           | 68               | 4.761904762  | 0               | 0.235955056 |
| TOP1    | 1        | 20            | 0           | 68               | 4.761904762  | 0               | 0.235955056 |
| IFNGR2  | 1        | 20            | 0           | 68               | 4.761904762  | 0               | 0.235955056 |
| PARP3   | 1        | 20            | 0           | 68               | 4.761904762  | 0               | 0.235955056 |
| FANCG   | 1        | 20            | 0           | 68               | 4.761904762  | 0               | 0.235955056 |
| BTK     | 1        | 20            | 0           | 68               | 4.761904762  | 0               | 0.235955056 |
| UZAF1   | 1        | 20            | 0           | 68               | 4.761904762  | 0               | 0.235955056 |
| CASP8   | 1        | 20            | 0           | 68               | 4.761904762  | 0               | 0.235955056 |
| GATA2   | 1        | 20            | 0           | 68               | 4.761904762  | 0               | 0.235955056 |
| CDC73   | 1        | 20            | 0           | 68               | 4.761904762  | 0               | 0.235955056 |
| LTK     | 1        | 20            | 0           | 68               | 4.761904762  | 0               | 0.235955056 |
| SLX4    | 1        | 20            | 0           | 68               | 4.761904762  | 0               | 0.235955056 |
| PLCG2   | 1        | 20            | 0           | 68               | 4.761904762  | 0               | 0.235955056 |
| SERPIN3 | 1        | 20            | 0           | 68               | 4.761904762  | 0               | 0.235955056 |
| ERCC3   | 1        | 20            | 0           | 68               | 4.761904762  | 0               | 0.235955056 |
| PMS1    | 1        | 20            | 0           | 68               | 4.761904762  | 0               | 0.235955056 |
| PHOX2B  | 1        | 20            | 0           | 68               | 4.761904762  | 0               | 0.235955056 |
| MSH3    | 1        | 20            | 0           | 68               | 4.761904762  | 0               | 0.235955056 |
| STAG2   | 1        | 20            | 0           | 68               | 4.761904762  | 0               | 0.235955056 |
| KDR     | 1        | 20            | 0           | 68               | 4.761904762  | 0               | 0.235955056 |
| MAF     | 1        | 20            | 0           | 68               | 4.761904762  | 0               | 0.235955056 |
| FLT3    | 1        | 20            | 0           | 68               | 4.761904762  | 0               | 0.235955056 |
| SMO     | 1        | 20            | 0           | 68               | 4.761904762  | 0               | 0.235955056 |
| CTNNA1  | 1        | 20            | 0           | 68               | 4.761904762  | 0               | 0.235955056 |
| IL6ST   | 1        | 20            | 1           | 67               | 4.761904762  | 1.470588235     | 0.418283963 |
| HDAC1   | 1        | 20            | 1           | 67               | 4.761904762  | 1.470588235     | 0.418283963 |
| ABL1    | 1        | 20            | 1           | 67               | 4.761904762  | 1.470588235     | 0.418283963 |
| FLT4    | 1        | 20            | 1           | 67               | 4.761904762  | 1.470588235     | 0.418283963 |
| DDR2    | 1        | 20            | 1           | 67               | 4.761904762  | 1.470588235     | 0.418283963 |
| PIK3R2  | 1        | 20            | 1           | 67               | 4.761904762  | 1.470588235     | 0.418283963 |
| NKX3-1  | 1        | 20            | 1           | 67               | 4.761904762  | 1.470588235     | 0.418283963 |
| ZNF703  | 1        | 20            | 1           | 67               | 4.761904762  | 1.470588235     | 0.418283963 |
| JAK2    | 1        | 20            | 1           | 67               | 4.761904762  | 1.470588235     | 0.418283963 |
| FAT4    | 1        | 20            | 1           | 67               | 4.761904762  | 1.470588235     | 0.418283963 |
| RARA    | 1        | 20            | 1           | 67               | 4.761904762  | 1.470588235     | 0.418283963 |
| ABCB1   | 1        | 20            | 1           | 67               | 4.761904762  | 1.470588235     | 0.418283963 |
| ATG2A   | 1        | 20            | 1           | 67               | 4.761904762  | 1.470588235     | 0.418283963 |
| ARID1B  | 1        | 20            | 1           | 67               | 4.761904762  | 1.470588235     | 0.418283963 |
| SMARCA1 | 1        | 20            | 1           | 67               | 4.761904762  | 1.470588235     | 0.418283963 |
| INSR    | 1        | 20            | 1           | 67               | 4.761904762  | 1.470588235     | 0.418283963 |
| HUWE1   | 1        | 20            | 1           | 67               | 4.761904762  | 1.470588235     | 0.418283963 |
| ATM     | 1        | 20            | 2           | 66               | 4.761904762  | 2.941176471     | 0.558698179 |
| APLN    | 1        | 20            | 1           | 67               | 4.761904762  | 1.470588235     | 0.418283963 |

| Gene     | COPD_Mut | COPD_Wildtype | nonCOPD_Mut | nonCOPD_Wildtype | COPD Freq(%) | nonCOPD Freq(%) | P-value     |
|----------|----------|---------------|-------------|------------------|--------------|-----------------|-------------|
| MAP3K13  | 1        | 20            | 2           | 66               | 4.761904762  | 2.941176471     | 0.558698179 |
| AR       | 1        | 20            | 2           | 66               | 4.761904762  | 2.941176471     | 0.558698179 |
| DNMT1    | 1        | 20            | 2           | 66               | 4.761904762  | 2.941176471     | 0.558698179 |
| NTRK1    | 1        | 20            | 2           | 66               | 4.761904762  | 2.941176471     | 0.558698179 |
| UGT1A1   | 1        | 20            | 2           | 66               | 4.761904762  | 2.941176471     | 0.558698179 |
| A2M      | 1        | 20            | 2           | 66               | 4.761904762  | 2.941176471     | 0.558698179 |
| EMSY     | 1        | 20            | 2           | 66               | 4.761904762  | 2.941176471     | 0.558698179 |
| ERBB2    | 1        | 20            | 2           | 66               | 4.761904762  | 2.941176471     | 0.558698179 |
| GATA6    | 1        | 20            | 2           | 66               | 4.761904762  | 2.941176471     | 0.558698179 |
| NSD1     | 1        | 20            | 2           | 66               | 4.761904762  | 2.941176471     | 0.558698179 |
| GLI1     | 1        | 20            | 2           | 66               | 4.761904762  | 2.941176471     | 0.558698179 |
| PAK5     | 1        | 20            | 2           | 66               | 4.761904762  | 2.941176471     | 0.558698179 |
| BCORL1   | 1        | 20            | 2           | 66               | 4.761904762  | 2.941176471     | 0.558698179 |
| PIK3CG   | 1        | 20            | 2           | 66               | 4.761904762  | 2.941176471     | 0.558698179 |
| MST1R    | 1        | 20            | 2           | 66               | 4.761904762  | 2.941176471     | 0.558698179 |
| NTRK2    | 1        | 20            | 4           | 64               | 4.761904762  | 5.882352941     | 1           |
| ARID2    | 1        | 20            | 5           | 63               | 4.761904762  | 7.352941176     | 1           |
| PTEN     | 1        | 20            | 5           | 63               | 4.761904762  | 7.352941176     | 1           |
| GNAS     | 1        | 20            | 3           | 65               | 4.761904762  | 4.411764706     | 1           |
| KMT2C    | 1        | 20            | 4           | 64               | 4.761904762  | 5.882352941     | 1           |
| NCOR1    | 1        | 20            | 3           | 65               | 4.761904762  | 4.411764706     | 1           |
| NOTCH1   | 1        | 20            | 4           | 64               | 4.761904762  | 5.882352941     | 1           |
| NTRK3    | 1        | 20            | 3           | 65               | 4.761904762  | 4.411764706     | 1           |
| KDM5C    | 1        | 20            | 5           | 63               | 4.761904762  | 7.352941176     | 1           |
| CIC      | 1        | 20            | 3           | 65               | 4.761904762  | 4.411764706     | 1           |
| CDKN2A   | 1        | 20            | 5           | 63               | 4.761904762  | 7.352941176     | 1           |
| PTPRD    | 1        | 20            | 5           | 63               | 4.761904762  | 7.352941176     | 1           |
| KRAS     | 1        | 20            | 5           | 63               | 4.761904762  | 7.352941176     | 1           |
| APC      | 1        | 20            | 5           | 63               | 4.761904762  | 7.352941176     | 1           |
| CTNNB1   | 0        | 21            | 8           | 60               | 0            | 11.76470588     | 0.18998358  |
| GRM3     | 0        | 21            | 6           | 62               | 0            | 8.823529412     | 0.328991828 |
| SMAD4    | 0        | 21            | 4           | 64               | 0            | 5.882352941     | 0.568961012 |
| INPP4B   | 0        | 21            | 2           | 66               | 0            | 2.941176471     | 1           |
| IDH2     | 0        | 21            | 1           | 67               | 0            | 1.470588235     | 1           |
| ERG      | 0        | 21            | 1           | 67               | 0            | 1.470588235     | 1           |
| MAP2K1   | 0        | 21            | 1           | 67               | 0            | 1.470588235     | 1           |
| ZNF217   | 0        | 21            | 1           | 67               | 0            | 1.470588235     | 1           |
| TET1     | 0        | 21            | 2           | 66               | 0            | 2.941176471     | 1           |
| SMAD3    | 0        | 21            | 1           | 67               | 0            | 1.470588235     | 1           |
| PLK1     | 0        | 21            | 2           | 66               | 0            | 2.941176471     | 1           |
| BCOR     | 0        | 21            | 3           | 65               | 0            | 4.411764706     | 1           |
| STAT5B   | 0        | 21            | 1           | 67               | 0            | 1.470588235     | 1           |
| FANCD2   | 0        | 21            | 1           | 67               | 0            | 1.470588235     | 1           |
| CD79A    | 0        | 21            | 1           | 67               | 0            | 1.470588235     | 1           |
| EZH2     | 0        | 21            | 1           | 67               | 0            | 1.470588235     | 1           |
| FOXA1    | 0        | 21            | 2           | 66               | 0            | 2.941176471     | 1           |
| TSHR     | 0        | 21            | 2           | 66               | 0            | 2.941176471     | 1           |
| ATRX     | 0        | 21            | 2           | 66               | 0            | 2.941176471     | 1           |
| CALR     | 0        | 21            | 1           | 67               | 0            | 1.470588235     | 1           |
| TGFBR1   | 0        | 21            | 1           | 67               | 0            | 1.470588235     | 1           |
| RECQL4   | 0        | 21            | 1           | 67               | 0            | 1.470588235     | 1           |
| CDK8     | 0        | 21            | 1           | 67               | 0            | 1.470588235     | 1           |
| KLHL6    | 0        | 21            | 1           | 67               | 0            | 1.470588235     | 1           |
| BCL6     | 0        | 21            | 1           | 67               | 0            | 1.470588235     | 1           |
| GATA1    | 0        | 21            | 1           | 67               | 0            | 1.470588235     | 1           |
| NF1      | 0        | 21            | 1           | 67               | 0            | 1.470588235     | 1           |
| P2RY8    | 0        | 21            | 2           | 66               | 0            | 2.941176471     | 1           |
| TRAF7    | 0        | 21            | 1           | 67               | 0            | 1.470588235     | 1           |
| RAD21    | 0        | 21            | 1           | 67               | 0            | 1.470588235     | 1           |
| RPS6KA3  | 0        | 21            | 1           | 67               | 0            | 1.470588235     | 1           |
| MERTK    | 0        | 21            | 1           | 67               | 0            | 1.470588235     | 1           |
| XPO1     | 0        | 21            | 3           | 65               | 0            | 4.411764706     | 1           |
| IRF2     | 0        | 21            | 1           | 67               | 0            | 1.470588235     | 1           |
| CCNE1    | 0        | 21            | 1           | 67               | 0            | 1.470588235     | 1           |
| FANCC    | 0        | 21            | 1           | 67               | 0            | 1.470588235     | 1           |
| IFNGR1   | 0        | 21            | 1           | 67               | 0            | 1.470588235     | 1           |
| CARD11   | 0        | 21            | 2           | 66               | 0            | 2.941176471     | 1           |
| H3F3C    | 0        | 21            | 1           | 67               | 0            | 1.470588235     | 1           |
| TERT     | 0        | 21            | 2           | 66               | 0            | 2.941176471     | 1           |
| B2M      | 0        | 21            | 2           | 66               | 0            | 2.941176471     | 1           |
| PAK3     | 0        | 21            | 2           | 66               | 0            | 2.941176471     | 1           |
| RXRA     | 0        | 21            | 1           | 67               | 0            | 1.470588235     | 1           |
| ACTL6A   | 0        | 21            | 1           | 67               | 0            | 1.470588235     | 1           |
| HIST1H3B | 0        | 21            | 1           | 67               | 0            | 1.470588235     | 1           |
| YES1     | 0        | 21            | 1           | 67               | 0            | 1.470588235     | 1           |



| Gene     | COPD_Mut | COPD_Wildtype | nonCOPD_Mut | nonCOPD_Wildtype | COPD Freq(%) | nonCOPD Freq(%) | P-value |
|----------|----------|---------------|-------------|------------------|--------------|-----------------|---------|
| SOS1     | 0        | 21            | 1           | 67               | 0            | 1.470588235     | 1       |
| DOT1L    | 0        | 21            | 1           | 67               | 0            | 1.470588235     | 1       |
| SF3B1    | 0        | 21            | 3           | 65               | 0            | 4.411764706     | 1       |
| RAD54L   | 0        | 21            | 1           | 67               | 0            | 1.470588235     | 1       |
| MAP3K1   | 0        | 21            | 1           | 67               | 0            | 1.470588235     | 1       |
| AKT1     | 0        | 21            | 1           | 67               | 0            | 1.470588235     | 1       |
| VEGFB    | 0        | 21            | 1           | 67               | 0            | 1.470588235     | 1       |
| PIK3C2G  | 0        | 21            | 1           | 67               | 0            | 1.470588235     | 1       |
| HIST1H1C | 0        | 21            | 1           | 67               | 0            | 1.470588235     | 1       |
| DIS3     | 0        | 21            | 2           | 66               | 0            | 2.941176471     | 1       |
| RICTOR   | 0        | 21            | 1           | 67               | 0            | 1.470588235     | 1       |
| THADA    | 0        | 21            | 3           | 65               | 0            | 4.411764706     | 1       |
| PMS2     | 0        | 21            | 1           | 67               | 0            | 1.470588235     | 1       |
| EPHB1    | 0        | 21            | 3           | 65               | 0            | 4.411764706     | 1       |
| BUB1B    | 0        | 21            | 1           | 67               | 0            | 1.470588235     | 1       |
| BRAF     | 0        | 21            | 1           | 67               | 0            | 1.470588235     | 1       |
| MYCN     | 0        | 21            | 1           | 67               | 0            | 1.470588235     | 1       |
| TP63     | 0        | 21            | 2           | 66               | 0            | 2.941176471     | 1       |
| STAT2    | 0        | 21            | 1           | 67               | 0            | 1.470588235     | 1       |
| ACVR2A   | 0        | 21            | 2           | 66               | 0            | 2.941176471     | 1       |
| FGF12    | 0        | 21            | 1           | 67               | 0            | 1.470588235     | 1       |
| CDKN1C   | 0        | 21            | 1           | 67               | 0            | 1.470588235     | 1       |
| PDGFRB   | 0        | 21            | 1           | 67               | 0            | 1.470588235     | 1       |
| PPP2R1A  | 0        | 21            | 1           | 67               | 0            | 1.470588235     | 1       |
| SDHB     | 0        | 21            | 2           | 66               | 0            | 2.941176471     | 1       |
| SMARCC2  | 0        | 21            | 1           | 67               | 0            | 1.470588235     | 1       |
| CSF1R    | 0        | 21            | 2           | 66               | 0            | 2.941176471     | 1       |
| STAT3    | 0        | 21            | 2           | 66               | 0            | 2.941176471     | 1       |
| SMARCE1  | 0        | 21            | 1           | 67               | 0            | 1.470588235     | 1       |
| FH       | 0        | 21            | 2           | 66               | 0            | 2.941176471     | 1       |
| TBX3     | 0        | 21            | 1           | 67               | 0            | 1.470588235     | 1       |
| TFG      | 0        | 21            | 1           | 67               | 0            | 1.470588235     | 1       |
| PIK3CB   | 0        | 21            | 1           | 67               | 0            | 1.470588235     | 1       |
| EPHA2    | 0        | 21            | 1           | 67               | 0            | 1.470588235     | 1       |
| POLD1    | 0        | 21            | 1           | 67               | 0            | 1.470588235     | 1       |
| SGK1     | 0        | 21            | 1           | 67               | 0            | 1.470588235     | 1       |
| PARP2    | 0        | 21            | 1           | 67               | 0            | 1.470588235     | 1       |
| TNFRSF14 | 0        | 21            | 1           | 67               | 0            | 1.470588235     | 1       |
| MED12    | 0        | 21            | 2           | 66               | 0            | 2.941176471     | 1       |
| BRD4     | 0        | 21            | 1           | 67               | 0            | 1.470588235     | 1       |
| FLT1     | 0        | 21            | 1           | 67               | 0            | 1.470588235     | 1       |
| CDKN1A   | 0        | 21            | 1           | 67               | 0            | 1.470588235     | 1       |
| HIST1H3D | 0        | 21            | 1           | 67               | 0            | 1.470588235     | 1       |
| FBXW7    | 0        | 21            | 1           | 67               | 0            | 1.470588235     | 1       |
| EPHA7    | 0        | 21            | 2           | 66               | 0            | 2.941176471     | 1       |
| MLH1     | 0        | 21            | 1           | 67               | 0            | 1.470588235     | 1       |
| PALB2    | 0        | 21            | 1           | 67               | 0            | 1.470588235     | 1       |
| RHOA     | 0        | 21            | 1           | 67               | 0            | 1.470588235     | 1       |
| RNF43    | 0        | 21            | 1           | 67               | 0            | 1.470588235     | 1       |
| EPCAM    | 0        | 21            | 1           | 67               | 0            | 1.470588235     | 1       |
| ETV1     | 0        | 21            | 1           | 67               | 0            | 1.470588235     | 1       |
| FGFR2    | 0        | 21            | 1           | 67               | 0            | 1.470588235     | 1       |
| TSC1     | 0        | 21            | 1           | 67               | 0            | 1.470588235     | 1       |
| GABRA6   | 0        | 21            | 1           | 67               | 0            | 1.470588235     | 1       |
| SOX17    | 0        | 21            | 1           | 67               | 0            | 1.470588235     | 1       |
| DDR1     | 0        | 21            | 2           | 66               | 0            | 2.941176471     | 1       |
| VTCN1    | 0        | 21            | 1           | 67               | 0            | 1.470588235     | 1       |
| STAT1    | 0        | 21            | 1           | 67               | 0            | 1.470588235     | 1       |
| CBL      | 0        | 21            | 2           | 66               | 0            | 2.941176471     | 1       |
| FYN      | 0        | 21            | 1           | 67               | 0            | 1.470588235     | 1       |
| ASXL1    | 0        | 21            | 1           | 67               | 0            | 1.470588235     | 1       |
| DNMT3A   | 0        | 21            | 1           | 67               | 0            | 1.470588235     | 1       |
| MAP2K4   | 0        | 21            | 1           | 67               | 0            | 1.470588235     | 1       |
| EPHB4    | 0        | 21            | 1           | 67               | 0            | 1.470588235     | 1       |
| PRKAR1A  | 0        | 21            | 1           | 67               | 0            | 1.470588235     | 1       |
| NF2      | 0        | 21            | 2           | 66               | 0            | 2.941176471     | 1       |
| MDM2     | 0        | 21            | 1           | 67               | 0            | 1.470588235     | 1       |
| PBRM1    | 0        | 21            | 1           | 67               | 0            | 1.470588235     | 1       |
| HRAS     | 0        | 21            | 1           | 67               | 0            | 1.470588235     | 1       |
| CHEK2    | 0        | 21            | 1           | 67               | 0            | 1.470588235     | 1       |
| PIK3C3   | 0        | 21            | 1           | 67               | 0            | 1.470588235     | 1       |
| BAP1     | 0        | 21            | 1           | 67               | 0            | 1.470588235     | 1       |
| IL6R     | 0        | 21            | 1           | 67               | 0            | 1.470588235     | 1       |
| CUL3     | 0        | 21            | 1           | 67               | 0            | 1.470588235     | 1       |
| ARFRP1   | 0        | 21            | 1           | 67               | 0            | 1.470588235     | 1       |
| MAPK1    | 0        | 21            | 1           | 67               | 0            | 1.470588235     | 1       |
| RET      | 0        | 21            | 1           | 67               | 0            | 1.470588235     | 1       |
| KDM6A    | 0        | 21            | 1           | 67               | 0            | 1.470588235     | 1       |
| CD74     | 0        | 21            | 1           | 67               | 0            | 1.470588235     | 1       |
| FLCN     | 0        | 21            | 1           | 67               | 0            | 1.470588235     | 1       |
| VEGFA    | 0        | 21            | 1           | 67               | 0            | 1.470588235     | 1       |
| ACVR1B   | 0        | 21            | 1           | 67               | 0            | 1.470588235     | 1       |

**Supplementary Table S5.** Clinicopathological information of EGFR-TKI treated patients

| Characteristic                   | COPD<br>No.of patients | non-COPD<br>No.of patients | P value        |
|----------------------------------|------------------------|----------------------------|----------------|
| Total of patients                | 7(100)                 | 20(100)                    |                |
| Age -no.(%)                      |                        |                            | <i>P=0.137</i> |
| <65(reference)                   | 0(0)                   | 7(35)                      |                |
| >=65                             | 7(100)                 | 13(65)                     |                |
| Sex-no.(%)                       |                        |                            | <i>P=0.209</i> |
| Male                             | 5(71)                  | 8(40)                      |                |
| Female                           | 2(29)                  | 12(60)                     |                |
| Histologic diagnosis — no. (%)   |                        |                            | <i>P=1</i>     |
| Adenocarcinoma                   | 7(100)                 | 19(95)                     |                |
| Squamous-cell carcinoma          | 0(0)                   | 1(5)                       |                |
| Clinical disease stage — no. (%) |                        |                            | <i>P=1</i>     |
| III                              | 0(0)                   | 2(10)                      |                |
| IV                               | 7(100)                 | 18(90)                     |                |
| Smoking history— no. (%)         |                        |                            | <i>P=1</i>     |
| Yes                              | 2(29)                  | 7(35)                      |                |
| No                               | 5(71)                  | 13(65)                     |                |
| TP53 comutation—no. (%)          |                        |                            | <i>P=1</i>     |
| Yes                              | 4(57)                  | 11(55)                     |                |
| No                               | 3(43)                  | 9(45)                      |                |

**Supplementary Table S6.** Detailed information of EGFR-TKI treated patients

| Patient number | Group    | Diagnostic time | Treatment   | Recurrence/last follow time | PFS(weeks) | PFS Status at Last Follow-up |
|----------------|----------|-----------------|-------------|-----------------------------|------------|------------------------------|
| P42            | COPD     | 2020/4/6        | Gefitinib   | 2020/9/5                    | 21.7       | 1                            |
| P20            | COPD     | 2021/2/9        | Osimertinib | 2021/4/13                   | 9.0        | 1                            |
| P14            | COPD     | 2020/3/9        | Gefitinib   | 2020/11/19                  | 34.6       | 1                            |
| P7             | COPD     | 2019/6/6        | Gefitinib   | 2020/10/11                  | 17.0       | 1                            |
| P2             | COPD     | 2019/9/11       | Gefitinib   | 2019/9/21                   | 1.4        | 1                            |
| P19            | COPD     | 2021/3/10       | Osimertinib | 2021/5/19                   | 7.4        | 0                            |
| P11            | COPD     | 2017/4/5        | Gefitinib   | 2018/3/14                   | 49.0       | 1                            |
| P108           | Non-COPD | 2019/10/20      | Gefitinib   | 2020/3/24                   | 22.3       | 1                            |
| P107           | Non-COPD | 2019/11/12      | Gefitinib   | 2020/6/15                   | 30.9       | 1                            |
| P102           | Non-COPD | 2020/1/6        | Gefitinib   | 2021/3/16                   | 58.7       | 1                            |
| P100           | Non-COPD | 2020/3/5        | Gefitinib   | 2021/2/3                    | 47.9       | 1                            |
| P95            | Non-COPD | 2020/5/22       | Erlotinib   | 2021/5/15                   | 51.1       | 1                            |
| P138           | Non-COPD | 2020/7/9        | Gefitinib   | 2020/12/22                  | 23.7       | 1                            |
| P79            | Non-COPD | 2020/10/17      | Osimertinib | 2021/6/20                   | 29.7       | 1                            |
| P139           | Non-COPD | 2020/11/15      | Erlotinib   | 2021/3/11                   | 16.6       | 1                            |
| P66            | Non-COPD | 2021/1/22       | Icotinib    | 2021/8/1                    | 22.4       | 0                            |
| P52            | Non-COPD | 2019/7/30       | Osimertinib | 2019/12/19                  | 18.1       | 1                            |
| P106           | Non-COPD | 2019/12/2       | Gefitinib   | 2021/6/16                   | 80.3       | 1                            |
| P133           | Non-COPD | 2020/3/19       | Gefitinib   | 2021/8/1                    | 71.4       | 1                            |
| P104           | Non-COPD | 2020/1/11       | Gefitinib   | 2021/8/1                    | 73.1       | 0                            |
| P97            | Non-COPD | 2020/5/9        | Afatinib    | 2021/8/1                    | 64.1       | 0                            |
| P94            | Non-COPD | 2020/5/16       | Icotinib    | 2021/8/1                    | 60.7       | 0                            |
| P77            | Non-COPD | 2020/11/16      | Icotinib    | 2021/8/1                    | 37.7       | 0                            |
| P72            | Non-COPD | 2021/1/8        | Osimertinib | 2021/5/10                   | 9.7        | 1                            |
| P131           | Non-COPD | 2019/9/15       | Gefitinib   | 2020/3/15                   | 21.7       | 1                            |
| P123           | Non-COPD | 2019/10/5       | Gefitinib   | 2020/9/15                   | 48.0       | 1                            |
| P134           | Non-COPD | 2019/11/12      | Osimertinib | 2021/8/1                    | 89.7       | 0                            |

**Supplementary Table S7.** The mutation frequency and Fisher's exact test of 539 genes between COPD-LC and non-COPD-LC in TCGA cohort.

| Gene     | COPD_Mut | COPD_Wildtype | nonCOPD_Mut | nonCOPD_Wildtype | COPD Freq(%) | nonCOPD Freq(%) | P-value     |
|----------|----------|---------------|-------------|------------------|--------------|-----------------|-------------|
| IKZF1    | 4        | 65            | 0           | 126              | 5.797101449  | 0               | 0.014800687 |
| MLH1     | 4        | 65            | 0           | 126              | 5.797101449  | 0               | 0.014800687 |
| GATA1    | 5        | 64            | 1           | 125              | 7.246376812  | 0.793650794     | 0.021738126 |
| EPHB1    | 8        | 61            | 4           | 122              | 11.5942029   | 3.174603175     | 0.027870486 |
| NFE2L2   | 9        | 60            | 5           | 121              | 13.04347826  | 3.968253968     | 0.038001177 |
| CYP2C19  | 3        | 66            | 0           | 126              | 4.347826087  | 0               | 0.043056543 |
| EED      | 3        | 66            | 0           | 126              | 4.347826087  | 0               | 0.043056543 |
| PTPN11   | 3        | 66            | 0           | 126              | 4.347826087  | 0               | 0.043056543 |
| TEK      | 3        | 66            | 0           | 126              | 4.347826087  | 0               | 0.043056543 |
| GRIN2A   | 9        | 60            | 6           | 120              | 13.04347826  | 4.761904762     | 0.049562403 |
| EP300    | 4        | 65            | 1           | 125              | 5.797101449  | 0.793650794     | 0.053855902 |
| FBXW7    | 4        | 65            | 1           | 125              | 5.797101449  | 0.793650794     | 0.053855902 |
| PIK3CG   | 10       | 59            | 7           | 119              | 14.49275362  | 5.555555556     | 0.059736356 |
| ARID1B   | 8        | 61            | 5           | 121              | 11.5942029   | 3.968253968     | 0.067567478 |
| ATG2A    | 6        | 63            | 3           | 123              | 8.695652174  | 2.380952381     | 0.069880307 |
| XPO1     | 0        | 69            | 6           | 120              | 0            | 4.761904762     | 0.091444214 |
| BRAF     | 1        | 68            | 10          | 116              | 1.449275362  | 7.936507937     | 0.100678206 |
| EGFR     | 1        | 68            | 10          | 116              | 1.449275362  | 7.936507937     | 0.100678206 |
| INHBA    | 1        | 68            | 9           | 117              | 1.449275362  | 7.142857143     | 0.101198855 |
| TET1     | 1        | 68            | 9           | 117              | 1.449275362  | 7.142857143     | 0.101198855 |
| EPHA3    | 9        | 60            | 8           | 118              | 13.04347826  | 6.349206349     | 0.120637532 |
| CALR     | 2        | 67            | 0           | 126              | 2.898550725  | 0               | 0.124028549 |
| CBFB     | 2        | 67            | 0           | 126              | 2.898550725  | 0               | 0.124028549 |
| FGFR3    | 2        | 67            | 0           | 126              | 2.898550725  | 0               | 0.124028549 |
| IGF1R    | 2        | 67            | 0           | 126              | 2.898550725  | 0               | 0.124028549 |
| IKBKE    | 2        | 67            | 0           | 126              | 2.898550725  | 0               | 0.124028549 |
| KLF4     | 2        | 67            | 0           | 126              | 2.898550725  | 0               | 0.124028549 |
| MCL1     | 2        | 67            | 0           | 126              | 2.898550725  | 0               | 0.124028549 |
| NTHL1    | 2        | 67            | 0           | 126              | 2.898550725  | 0               | 0.124028549 |
| PHOX2B   | 2        | 67            | 0           | 126              | 2.898550725  | 0               | 0.124028549 |
| RNF43    | 2        | 67            | 0           | 126              | 2.898550725  | 0               | 0.124028549 |
| RXRA     | 2        | 67            | 0           | 126              | 2.898550725  | 0               | 0.124028549 |
| VTCN1    | 2        | 67            | 0           | 126              | 2.898550725  | 0               | 0.124028549 |
| DOT1L    | 3        | 66            | 1           | 125              | 4.347826087  | 0.793650794     | 0.127824112 |
| FGFR4    | 3        | 66            | 1           | 125              | 4.347826087  | 0.793650794     | 0.127824112 |
| NBN      | 3        | 66            | 1           | 125              | 4.347826087  | 0.793650794     | 0.127824112 |
| YES1     | 3        | 66            | 1           | 125              | 4.347826087  | 0.793650794     | 0.127824112 |
| A2M      | 5        | 64            | 3           | 123              | 7.246376812  | 2.380952381     | 0.133888454 |
| NTRK3    | 8        | 61            | 7           | 119              | 11.5942029   | 5.555555556     | 0.161715575 |
| PAX5     | 0        | 69            | 5           | 121              | 0            | 3.968253968     | 0.163311742 |
| TP63     | 0        | 69            | 5           | 121              | 0            | 3.968253968     | 0.163311742 |
| MUC16    | 36       | 33            | 53          | 73               | 52.17391304  | 42.06349206     | 0.180471171 |
| JAK3     | 4        | 65            | 2           | 124              | 5.797101449  | 1.587301587     | 0.18779754  |
| NTRK1    | 4        | 65            | 2           | 124              | 5.797101449  | 1.587301587     | 0.18779754  |
| PTCH1    | 4        | 65            | 2           | 124              | 5.797101449  | 1.587301587     | 0.18779754  |
| ZNF217   | 4        | 65            | 2           | 124              | 5.797101449  | 1.587301587     | 0.18779754  |
| TP53     | 47       | 22            | 74          | 52               | 68.11594203  | 58.73015873     | 0.219263662 |
| CDKN2A   | 7        | 62            | 6           | 120              | 10.14492754  | 4.761904762     | 0.227834671 |
| DNMT3A   | 4        | 65            | 3           | 123              | 5.797101449  | 2.380952381     | 0.246637204 |
| GRM3     | 4        | 65            | 3           | 123              | 5.797101449  | 2.380952381     | 0.246637204 |
| SMARCA1  | 4        | 65            | 3           | 123              | 5.797101449  | 2.380952381     | 0.246637204 |
| SPEN     | 4        | 65            | 3           | 123              | 5.797101449  | 2.380952381     | 0.246637204 |
| BRIP1    | 1        | 68            | 7           | 119              | 1.449275362  | 5.555555556     | 0.263836987 |
| GNAS     | 1        | 68            | 7           | 119              | 1.449275362  | 5.555555556     | 0.263836987 |
| IGFN1    | 1        | 68            | 7           | 119              | 1.449275362  | 5.555555556     | 0.263836987 |
| SERPINB4 | 1        | 68            | 7           | 119              | 1.449275362  | 5.555555556     | 0.263836987 |
| SF3B1    | 1        | 68            | 7           | 119              | 1.449275362  | 5.555555556     | 0.263836987 |
| FLT1     | 8        | 61            | 8           | 118              | 11.5942029   | 6.349206349     | 0.274505038 |
| DAPK1    | 5        | 64            | 4           | 122              | 7.246376812  | 3.174603175     | 0.28367214  |
| GABRA6   | 5        | 64            | 4           | 122              | 7.246376812  | 3.174603175     | 0.28367214  |
| PIK3C2G  | 5        | 64            | 4           | 122              | 7.246376812  | 3.174603175     | 0.28367214  |
| ATG13    | 2        | 67            | 1           | 125              | 2.898550725  | 0.793650794     | 0.285972561 |
| BRD4     | 2        | 67            | 1           | 125              | 2.898550725  | 0.793650794     | 0.285972561 |
| C10orf11 | 2        | 67            | 1           | 125              | 2.898550725  | 0.793650794     | 0.285972561 |
| CTNNB1   | 2        | 67            | 1           | 125              | 2.898550725  | 0.793650794     | 0.285972561 |
| CUL4A    | 2        | 67            | 1           | 125              | 2.898550725  | 0.793650794     | 0.285972561 |
| FGFR1    | 2        | 67            | 1           | 125              | 2.898550725  | 0.793650794     | 0.285972561 |

| Gene     | COPD_Mut | COPD_Wildtype | nonCOPD_Mut | nonCOPD_Wildtype | COPD Freq(%) | nonCOPD Freq(%) | P-value     |
|----------|----------|---------------|-------------|------------------|--------------|-----------------|-------------|
| HIST1H1C | 2        | 67            | 1           | 125              | 2.898550725  | 0.793650794     | 0.285972561 |
| MAP2K1   | 2        | 67            | 1           | 125              | 2.898550725  | 0.793650794     | 0.285972561 |
| MITF     | 2        | 67            | 1           | 125              | 2.898550725  | 0.793650794     | 0.285972561 |
| MSH3     | 2        | 67            | 1           | 125              | 2.898550725  | 0.793650794     | 0.285972561 |
| NOTCH3   | 2        | 67            | 1           | 125              | 2.898550725  | 0.793650794     | 0.285972561 |
| RAD21    | 2        | 67            | 1           | 125              | 2.898550725  | 0.793650794     | 0.285972561 |
| RAD51B   | 2        | 67            | 1           | 125              | 2.898550725  | 0.793650794     | 0.285972561 |
| SDHA     | 2        | 67            | 1           | 125              | 2.898550725  | 0.793650794     | 0.285972561 |
| SMARCC1  | 2        | 67            | 1           | 125              | 2.898550725  | 0.793650794     | 0.285972561 |
| STAT4    | 2        | 67            | 1           | 125              | 2.898550725  | 0.793650794     | 0.285972561 |
| TGFBR1   | 2        | 67            | 1           | 125              | 2.898550725  | 0.793650794     | 0.285972561 |
| WNT10A   | 2        | 67            | 1           | 125              | 2.898550725  | 0.793650794     | 0.285972561 |
| DDR1     | 0        | 69            | 4           | 122              | 0            | 3.174603175     | 0.299185304 |
| EXT2     | 0        | 69            | 4           | 122              | 0            | 3.174603175     | 0.299185304 |
| GATA3    | 0        | 69            | 4           | 122              | 0            | 3.174603175     | 0.299185304 |
| PAK3     | 0        | 69            | 4           | 122              | 0            | 3.174603175     | 0.299185304 |
| PRSS1    | 0        | 69            | 4           | 122              | 0            | 3.174603175     | 0.299185304 |
| SOX9     | 0        | 69            | 4           | 122              | 0            | 3.174603175     | 0.299185304 |
| TNFAIP3  | 0        | 69            | 4           | 122              | 0            | 3.174603175     | 0.299185304 |
| TSHR     | 0        | 69            | 4           | 122              | 0            | 3.174603175     | 0.299185304 |
| PDGFRA   | 8        | 61            | 9           | 117              | 11.5942029   | 7.142857143     | 0.300227698 |
| ATM      | 5        | 64            | 5           | 121              | 7.246376812  | 3.968253968     | 0.328869182 |
| INSR     | 5        | 64            | 5           | 121              | 7.246376812  | 3.968253968     | 0.328869182 |
| LATS1    | 5        | 64            | 5           | 121              | 7.246376812  | 3.968253968     | 0.328869182 |
| RBM10    | 5        | 64            | 5           | 121              | 7.246376812  | 3.968253968     | 0.328869182 |
| PTPRB    | 10       | 59            | 12          | 114              | 14.49275362  | 9.523809524     | 0.345697192 |
| ACVR1B   | 3        | 66            | 2           | 124              | 4.347826087  | 1.587301587     | 0.348232267 |
| ASXL1    | 3        | 66            | 2           | 124              | 4.347826087  | 1.587301587     | 0.348232267 |
| CSF1R    | 3        | 66            | 2           | 124              | 4.347826087  | 1.587301587     | 0.348232267 |
| CUL3     | 3        | 66            | 2           | 124              | 4.347826087  | 1.587301587     | 0.348232267 |
| EPHA2    | 3        | 66            | 2           | 124              | 4.347826087  | 1.587301587     | 0.348232267 |
| NRAS     | 3        | 66            | 2           | 124              | 4.347826087  | 1.587301587     | 0.348232267 |
| SH2D1A   | 3        | 66            | 2           | 124              | 4.347826087  | 1.587301587     | 0.348232267 |
| TSC2     | 3        | 66            | 2           | 124              | 4.347826087  | 1.587301587     | 0.348232267 |
| PRKDC    | 6        | 63            | 6           | 120              | 8.695652174  | 4.761904762     | 0.351523176 |
| AKT1     | 1        | 68            | 0           | 126              | 1.449275362  | 0               | 0.353846154 |
| AURKA    | 1        | 68            | 0           | 126              | 1.449275362  | 0               | 0.353846154 |
| AURKB    | 1        | 68            | 0           | 126              | 1.449275362  | 0               | 0.353846154 |
| AXIN2    | 1        | 68            | 0           | 126              | 1.449275362  | 0               | 0.353846154 |
| AXL      | 1        | 68            | 0           | 126              | 1.449275362  | 0               | 0.353846154 |
| BCL2L11  | 1        | 68            | 0           | 126              | 1.449275362  | 0               | 0.353846154 |
| CCND1    | 1        | 68            | 0           | 126              | 1.449275362  | 0               | 0.353846154 |
| CCND3    | 1        | 68            | 0           | 126              | 1.449275362  | 0               | 0.353846154 |
| CD274    | 1        | 68            | 0           | 126              | 1.449275362  | 0               | 0.353846154 |
| CD79A    | 1        | 68            | 0           | 126              | 1.449275362  | 0               | 0.353846154 |
| CD79B    | 1        | 68            | 0           | 126              | 1.449275362  | 0               | 0.353846154 |
| CDK6     | 1        | 68            | 0           | 126              | 1.449275362  | 0               | 0.353846154 |
| CFHR1    | 1        | 68            | 0           | 126              | 1.449275362  | 0               | 0.353846154 |
| CIITA    | 1        | 68            | 0           | 126              | 1.449275362  | 0               | 0.353846154 |
| CRKL     | 1        | 68            | 0           | 126              | 1.449275362  | 0               | 0.353846154 |
| CTLA4    | 1        | 68            | 0           | 126              | 1.449275362  | 0               | 0.353846154 |
| CYP17A1  | 1        | 68            | 0           | 126              | 1.449275362  | 0               | 0.353846154 |
| DHFR     | 1        | 68            | 0           | 126              | 1.449275362  | 0               | 0.353846154 |
| ERCC3    | 1        | 68            | 0           | 126              | 1.449275362  | 0               | 0.353846154 |
| FZR1     | 1        | 68            | 0           | 126              | 1.449275362  | 0               | 0.353846154 |
| H3F3C    | 1        | 68            | 0           | 126              | 1.449275362  | 0               | 0.353846154 |
| HIST2H3D | 1        | 68            | 0           | 126              | 1.449275362  | 0               | 0.353846154 |
| HNF1B    | 1        | 68            | 0           | 126              | 1.449275362  | 0               | 0.353846154 |
| IDH1     | 1        | 68            | 0           | 126              | 1.449275362  | 0               | 0.353846154 |
| IGF2     | 1        | 68            | 0           | 126              | 1.449275362  | 0               | 0.353846154 |
| IRS2     | 1        | 68            | 0           | 126              | 1.449275362  | 0               | 0.353846154 |
| MAF      | 1        | 68            | 0           | 126              | 1.449275362  | 0               | 0.353846154 |
| MAX      | 1        | 68            | 0           | 126              | 1.449275362  | 0               | 0.353846154 |
| MKNK1    | 1        | 68            | 0           | 126              | 1.449275362  | 0               | 0.353846154 |
| PIGR     | 1        | 68            | 0           | 126              | 1.449275362  | 0               | 0.353846154 |
| QKI      | 1        | 68            | 0           | 126              | 1.449275362  | 0               | 0.353846154 |
| REL      | 1        | 68            | 0           | 126              | 1.449275362  | 0               | 0.353846154 |
| SDC4     | 1        | 68            | 0           | 126              | 1.449275362  | 0               | 0.353846154 |
| SOD2     | 1        | 68            | 0           | 126              | 1.449275362  | 0               | 0.353846154 |

| Gene     | COPD_Mut | COPD_Wildtype | nonCOPD_Mut | nonCOPD_Wildtype | COPD Freq(%) | nonCOPD Freq(%) | P-value     |
|----------|----------|---------------|-------------|------------------|--------------|-----------------|-------------|
| SOX17    | 1        | 68            | 0           | 126              | 1.449275362  | 0               | 0.353846154 |
| SPOP     | 1        | 68            | 0           | 126              | 1.449275362  | 0               | 0.353846154 |
| SYK      | 1        | 68            | 0           | 126              | 1.449275362  | 0               | 0.353846154 |
| TMEM173  | 1        | 68            | 0           | 126              | 1.449275362  | 0               | 0.353846154 |
| TOP1     | 1        | 68            | 0           | 126              | 1.449275362  | 0               | 0.353846154 |
| U2AF1    | 1        | 68            | 0           | 126              | 1.449275362  | 0               | 0.353846154 |
| WNT7B    | 1        | 68            | 0           | 126              | 1.449275362  | 0               | 0.353846154 |
| ZNF703   | 1        | 68            | 0           | 126              | 1.449275362  | 0               | 0.353846154 |
| PREX2    | 3        | 66            | 11          | 115              | 4.347826087  | 8.73015873      | 0.38583059  |
| KEAP1    | 13       | 56            | 18          | 108              | 18.84057971  | 14.28571429     | 0.41868487  |
| FLT3     | 1        | 68            | 6           | 120              | 1.449275362  | 4.761904762     | 0.424774984 |
| INPP4B   | 1        | 68            | 6           | 120              | 1.449275362  | 4.761904762     | 0.424774984 |
| PALB2    | 1        | 68            | 6           | 120              | 1.449275362  | 4.761904762     | 0.424774984 |
| CDC73    | 1        | 68            | 5           | 121              | 1.449275362  | 3.968253968     | 0.426296055 |
| ERBB2    | 1        | 68            | 5           | 121              | 1.449275362  | 3.968253968     | 0.426296055 |
| GLI1     | 1        | 68            | 5           | 121              | 1.449275362  | 3.968253968     | 0.426296055 |
| IRS1     | 1        | 68            | 5           | 121              | 1.449275362  | 3.968253968     | 0.426296055 |
| KLHL6    | 1        | 68            | 5           | 121              | 1.449275362  | 3.968253968     | 0.426296055 |
| SETD2    | 1        | 68            | 5           | 121              | 1.449275362  | 3.968253968     | 0.426296055 |
| TYRO3    | 1        | 68            | 5           | 121              | 1.449275362  | 3.968253968     | 0.426296055 |
| WRN      | 1        | 68            | 5           | 121              | 1.449275362  | 3.968253968     | 0.426296055 |
| ATR      | 4        | 65            | 4           | 122              | 5.797101449  | 3.174603175     | 0.456847353 |
| KRAS     | 12       | 57            | 29          | 97               | 17.39130435  | 23.01587302     | 0.462603006 |
| ALK      | 5        | 64            | 6           | 120              | 7.246376812  | 4.761904762     | 0.523682548 |
| APC      | 5        | 64            | 6           | 120              | 7.246376812  | 4.761904762     | 0.523682548 |
| PIK3CA   | 5        | 64            | 6           | 120              | 7.246376812  | 4.761904762     | 0.523682548 |
| ROS1     | 5        | 64            | 6           | 120              | 7.246376812  | 4.761904762     | 0.523682548 |
| ACVR2A   | 0        | 69            | 2           | 124              | 0            | 1.587301587     | 0.54036479  |
| AKT2     | 0        | 69            | 2           | 124              | 0            | 1.587301587     | 0.54036479  |
| BAP1     | 0        | 69            | 2           | 124              | 0            | 1.587301587     | 0.54036479  |
| BARD1    | 0        | 69            | 2           | 124              | 0            | 1.587301587     | 0.54036479  |
| BCL10    | 0        | 69            | 2           | 124              | 0            | 1.587301587     | 0.54036479  |
| BMPR1A   | 0        | 69            | 2           | 124              | 0            | 1.587301587     | 0.54036479  |
| ESR1     | 0        | 69            | 2           | 124              | 0            | 1.587301587     | 0.54036479  |
| EZH2     | 0        | 69            | 2           | 124              | 0            | 1.587301587     | 0.54036479  |
| FUBP1    | 0        | 69            | 2           | 124              | 0            | 1.587301587     | 0.54036479  |
| GSK3B    | 0        | 69            | 2           | 124              | 0            | 1.587301587     | 0.54036479  |
| HDAC1    | 0        | 69            | 2           | 124              | 0            | 1.587301587     | 0.54036479  |
| HDAC2    | 0        | 69            | 2           | 124              | 0            | 1.587301587     | 0.54036479  |
| HLA-DQB1 | 0        | 69            | 2           | 124              | 0            | 1.587301587     | 0.54036479  |
| HRAS     | 0        | 69            | 2           | 124              | 0            | 1.587301587     | 0.54036479  |
| LIG3     | 0        | 69            | 2           | 124              | 0            | 1.587301587     | 0.54036479  |
| P2RY8    | 0        | 69            | 2           | 124              | 0            | 1.587301587     | 0.54036479  |
| PRDM1    | 0        | 69            | 2           | 124              | 0            | 1.587301587     | 0.54036479  |
| RAD54L   | 0        | 69            | 2           | 124              | 0            | 1.587301587     | 0.54036479  |
| RAF1     | 0        | 69            | 2           | 124              | 0            | 1.587301587     | 0.54036479  |
| RHOA     | 0        | 69            | 2           | 124              | 0            | 1.587301587     | 0.54036479  |
| SERPINB3 | 0        | 69            | 2           | 124              | 0            | 1.587301587     | 0.54036479  |
| SMAD3    | 0        | 69            | 2           | 124              | 0            | 1.587301587     | 0.54036479  |
| XPC      | 0        | 69            | 2           | 124              | 0            | 1.587301587     | 0.54036479  |
| MTOR     | 3        | 66            | 9           | 117              | 4.347826087  | 7.142857143     | 0.544618899 |
| BCORL1   | 6        | 63            | 7           | 119              | 8.695652174  | 5.555555556     | 0.549251058 |
| ABL1     | 0        | 69            | 3           | 123              | 0            | 2.380952381     | 0.553463203 |
| BAK1     | 0        | 69            | 3           | 123              | 0            | 2.380952381     | 0.553463203 |
| BLM      | 0        | 69            | 3           | 123              | 0            | 2.380952381     | 0.553463203 |
| CASP8    | 0        | 69            | 3           | 123              | 0            | 2.380952381     | 0.553463203 |
| CCND2    | 0        | 69            | 3           | 123              | 0            | 2.380952381     | 0.553463203 |
| CSF3R    | 0        | 69            | 3           | 123              | 0            | 2.380952381     | 0.553463203 |
| CTNNA1   | 0        | 69            | 3           | 123              | 0            | 2.380952381     | 0.553463203 |
| EXT1     | 0        | 69            | 3           | 123              | 0            | 2.380952381     | 0.553463203 |
| GATA2    | 0        | 69            | 3           | 123              | 0            | 2.380952381     | 0.553463203 |
| HIST1H3D | 0        | 69            | 3           | 123              | 0            | 2.380952381     | 0.553463203 |
| HLA-A    | 0        | 69            | 3           | 123              | 0            | 2.380952381     | 0.553463203 |
| MEN1     | 0        | 69            | 3           | 123              | 0            | 2.380952381     | 0.553463203 |
| NPM1     | 0        | 69            | 3           | 123              | 0            | 2.380952381     | 0.553463203 |
| SRSF2    | 0        | 69            | 3           | 123              | 0            | 2.380952381     | 0.553463203 |
| STAT2    | 0        | 69            | 3           | 123              | 0            | 2.380952381     | 0.553463203 |
| STAT3    | 0        | 69            | 3           | 123              | 0            | 2.380952381     | 0.553463203 |
| TCF7L2   | 0        | 69            | 3           | 123              | 0            | 2.380952381     | 0.553463203 |
| TRAF7    | 0        | 69            | 3           | 123              | 0            | 2.380952381     | 0.553463203 |

| Gene      | COPD_Mut | COPD_Wildtype | nonCOPD_Mut | nonCOPD_Wildtype | COPD Freq(%) | nonCOPD Freq(%) | P-value     |
|-----------|----------|---------------|-------------|------------------|--------------|-----------------|-------------|
| XRCC2     | 0        | 69            | 3           | 123              | 0            | 2.380952381     | 0.553463203 |
| BRCA2     | 6        | 63            | 8           | 118              | 8.695652174  | 6.349206349     | 0.569966328 |
| BCOR      | 7        | 62            | 9           | 117              | 10.14492754  | 7.142857143     | 0.586210958 |
| KDR       | 7        | 62            | 9           | 117              | 10.14492754  | 7.142857143     | 0.586210958 |
| APLN      | 2        | 67            | 2           | 124              | 2.898550725  | 1.587301587     | 0.615482202 |
| BUB1B     | 2        | 67            | 2           | 124              | 2.898550725  | 1.587301587     | 0.615482202 |
| CYLD      | 2        | 67            | 2           | 124              | 2.898550725  | 1.587301587     | 0.615482202 |
| EPHB4     | 2        | 67            | 2           | 124              | 2.898550725  | 1.587301587     | 0.615482202 |
| FYN       | 2        | 67            | 2           | 124              | 2.898550725  | 1.587301587     | 0.615482202 |
| GNAQ      | 2        | 67            | 2           | 124              | 2.898550725  | 1.587301587     | 0.615482202 |
| HNF1A     | 2        | 67            | 2           | 124              | 2.898550725  | 1.587301587     | 0.615482202 |
| MERTK     | 2        | 67            | 2           | 124              | 2.898550725  | 1.587301587     | 0.615482202 |
| MST1R     | 2        | 67            | 2           | 124              | 2.898550725  | 1.587301587     | 0.615482202 |
| PLCG2     | 2        | 67            | 2           | 124              | 2.898550725  | 1.587301587     | 0.615482202 |
| TET2      | 2        | 67            | 2           | 124              | 2.898550725  | 1.587301587     | 0.615482202 |
| CIC       | 1        | 68            | 4           | 122              | 1.449275362  | 3.174603175     | 0.657759028 |
| DDR2      | 1        | 68            | 4           | 122              | 1.449275362  | 3.174603175     | 0.657759028 |
| FGA       | 1        | 68            | 4           | 122              | 1.449275362  | 3.174603175     | 0.657759028 |
| FH        | 1        | 68            | 4           | 122              | 1.449275362  | 3.174603175     | 0.657759028 |
| FLT4      | 1        | 68            | 4           | 122              | 1.449275362  | 3.174603175     | 0.657759028 |
| HIST3H3   | 1        | 68            | 4           | 122              | 1.449275362  | 3.174603175     | 0.657759028 |
| PBRM1     | 1        | 68            | 4           | 122              | 1.449275362  | 3.174603175     | 0.657759028 |
| SMO       | 1        | 68            | 4           | 122              | 1.449275362  | 3.174603175     | 0.657759028 |
| TNFRSF11A | 1        | 68            | 4           | 122              | 1.449275362  | 3.174603175     | 0.657759028 |
| ATG7      | 3        | 66            | 3           | 123              | 4.347826087  | 2.380952381     | 0.667666004 |
| FOXP1     | 3        | 66            | 3           | 123              | 4.347826087  | 2.380952381     | 0.667666004 |
| RET       | 3        | 66            | 3           | 123              | 4.347826087  | 2.380952381     | 0.667666004 |
| MAP3K13   | 3        | 66            | 4           | 122              | 4.347826087  | 3.174603175     | 0.699668537 |
| SMARCC2   | 3        | 66            | 4           | 122              | 4.347826087  | 3.174603175     | 0.699668537 |
| BRCA1     | 2        | 67            | 6           | 120              | 2.898550725  | 4.761904762     | 0.714578609 |
| ERBB3     | 2        | 67            | 6           | 120              | 2.898550725  | 4.761904762     | 0.714578609 |
| KDM5A     | 2        | 67            | 6           | 120              | 2.898550725  | 4.761904762     | 0.714578609 |
| BTK       | 4        | 65            | 5           | 121              | 5.797101449  | 3.968253968     | 0.722973356 |
| IL7R      | 4        | 65            | 5           | 121              | 5.797101449  | 3.968253968     | 0.722973356 |
| JAK2      | 4        | 65            | 5           | 121              | 5.797101449  | 3.968253968     | 0.722973356 |
| NCOR1     | 4        | 65            | 5           | 121              | 5.797101449  | 3.968253968     | 0.722973356 |
| NUTM1     | 4        | 65            | 5           | 121              | 5.797101449  | 3.968253968     | 0.722973356 |
| PTPRO     | 4        | 65            | 5           | 121              | 5.797101449  | 3.968253968     | 0.722973356 |
| SMAD4     | 4        | 65            | 5           | 121              | 5.797101449  | 3.968253968     | 0.722973356 |
| THADA     | 4        | 65            | 5           | 121              | 5.797101449  | 3.968253968     | 0.722973356 |
| CDK12     | 4        | 65            | 6           | 120              | 5.797101449  | 4.761904762     | 0.744675904 |
| CREBBP    | 4        | 65            | 6           | 120              | 5.797101449  | 4.761904762     | 0.744675904 |
| MED12     | 4        | 65            | 6           | 120              | 5.797101449  | 4.761904762     | 0.744675904 |
| RICTOR    | 4        | 65            | 6           | 120              | 5.797101449  | 4.761904762     | 0.744675904 |
| EPHA7     | 5        | 64            | 7           | 119              | 7.246376812  | 5.555555556     | 0.756993942 |
| NSD1      | 5        | 64            | 7           | 119              | 7.246376812  | 5.555555556     | 0.756993942 |
| LRP1B     | 26       | 43            | 51          | 75               | 37.68115942  | 40.47619048     | 0.760332764 |
| AMER1     | 5        | 64            | 8           | 118              | 7.246376812  | 6.349206349     | 0.773666489 |
| ARID2     | 5        | 64            | 8           | 118              | 7.246376812  | 6.349206349     | 0.773666489 |
| ABCB1     | 6        | 63            | 13          | 113              | 8.695652174  | 10.31746032     | 0.804891251 |
| STK11     | 6        | 63            | 13          | 113              | 8.695652174  | 10.31746032     | 0.804891251 |
| FAT1      | 9        | 60            | 15          | 111              | 13.04347826  | 11.9047619      | 0.822680439 |
| HUWE1     | 9        | 60            | 15          | 111              | 13.04347826  | 11.9047619      | 0.822680439 |
| NF1       | 8        | 61            | 17          | 109              | 11.5942029   | 13.49206349     | 0.824293482 |
| EPHA5     | 10       | 59            | 16          | 110              | 14.49275362  | 12.6984127      | 0.826117426 |
| KMT2C     | 11       | 58            | 18          | 108              | 15.94202899  | 14.28571429     | 0.833950032 |
| SPTA1     | 15       | 54            | 29          | 97               | 21.73913043  | 23.01587302     | 1           |
| PTPRD     | 12       | 57            | 22          | 104              | 17.39130435  | 17.46031746     | 1           |
| FAT3      | 11       | 58            | 19          | 107              | 15.94202899  | 15.07936508     | 1           |
| ERBB4     | 8        | 61            | 14          | 112              | 11.5942029   | 11.11111111     | 1           |
| FAT4      | 8        | 61            | 15          | 111              | 11.5942029   | 11.9047619      | 1           |
| FAT2      | 6        | 63            | 11          | 115              | 8.695652174  | 8.73015873      | 1           |
| NOTCH4    | 6        | 63            | 11          | 115              | 8.695652174  | 8.73015873      | 1           |
| PTEN      | 6        | 63            | 10          | 116              | 8.695652174  | 7.936507937     | 1           |
| RB1       | 6        | 63            | 11          | 115              | 8.695652174  | 8.73015873      | 1           |
| NOTCH1    | 5        | 64            | 9           | 117              | 7.246376812  | 7.142857143     | 1           |
| CFH       | 4        | 65            | 8           | 118              | 5.797101449  | 6.349206349     | 1           |
| DYNC2H1   | 4        | 65            | 7           | 119              | 5.797101449  | 5.555555556     | 1           |
| STAG2     | 4        | 65            | 8           | 118              | 5.797101449  | 6.349206349     | 1           |
| ARID1A    | 3        | 66            | 7           | 119              | 4.347826087  | 5.555555556     | 1           |

| Gene     | COPD_Mut | COPD_Wildtype | nonCOPD_Mut | nonCOPD_Wildtype | COPD Freq(%) | nonCOPD Freq(%) | P-value |
|----------|----------|---------------|-------------|------------------|--------------|-----------------|---------|
| ATRX     | 3        | 66            | 7           | 119              | 4.347826087  | 5.555555556     | 1       |
| CARD11   | 3        | 66            | 7           | 119              | 4.347826087  | 5.555555556     | 1       |
| HGF      | 3        | 66            | 7           | 119              | 4.347826087  | 5.555555556     | 1       |
| NOTCH2   | 3        | 66            | 7           | 119              | 4.347826087  | 5.555555556     | 1       |
| NTRK2    | 3        | 66            | 6           | 120              | 4.347826087  | 4.761904762     | 1       |
| POLE     | 3        | 66            | 7           | 119              | 4.347826087  | 5.555555556     | 1       |
| SLCO1B1  | 3        | 66            | 5           | 121              | 4.347826087  | 3.968253968     | 1       |
| SMARCA4  | 3        | 66            | 7           | 119              | 4.347826087  | 5.555555556     | 1       |
| ALOX12B  | 2        | 67            | 4           | 122              | 2.898550725  | 3.174603175     | 1       |
| ARID5B   | 2        | 67            | 4           | 122              | 2.898550725  | 3.174603175     | 1       |
| BCL6     | 2        | 67            | 3           | 123              | 2.898550725  | 2.380952381     | 1       |
| CHD4     | 2        | 67            | 5           | 121              | 2.898550725  | 3.968253968     | 1       |
| CHEK2    | 2        | 67            | 4           | 122              | 2.898550725  | 3.174603175     | 1       |
| DICER1   | 2        | 67            | 3           | 123              | 2.898550725  | 2.380952381     | 1       |
| EPAS1    | 2        | 67            | 4           | 122              | 2.898550725  | 3.174603175     | 1       |
| FGF23    | 2        | 67            | 5           | 121              | 2.898550725  | 3.968253968     | 1       |
| FGF6     | 2        | 67            | 3           | 123              | 2.898550725  | 2.380952381     | 1       |
| FGFR2    | 2        | 67            | 3           | 123              | 2.898550725  | 2.380952381     | 1       |
| KDM6A    | 2        | 67            | 3           | 123              | 2.898550725  | 2.380952381     | 1       |
| KEL      | 2        | 67            | 3           | 123              | 2.898550725  | 2.380952381     | 1       |
| KIT      | 2        | 67            | 4           | 122              | 2.898550725  | 3.174603175     | 1       |
| MET      | 2        | 67            | 3           | 123              | 2.898550725  | 2.380952381     | 1       |
| MSH6     | 2        | 67            | 3           | 123              | 2.898550725  | 2.380952381     | 1       |
| PDGFRB   | 2        | 67            | 3           | 123              | 2.898550725  | 2.380952381     | 1       |
| PIK3C2B  | 2        | 67            | 5           | 121              | 2.898550725  | 3.968253968     | 1       |
| PPP2R1A  | 2        | 67            | 4           | 122              | 2.898550725  | 3.174603175     | 1       |
| SLX4     | 2        | 67            | 3           | 123              | 2.898550725  | 2.380952381     | 1       |
| SNCAIP   | 2        | 67            | 5           | 121              | 2.898550725  | 3.968253968     | 1       |
| SOS1     | 2        | 67            | 4           | 122              | 2.898550725  | 3.174603175     | 1       |
| TOP2A    | 2        | 67            | 3           | 123              | 2.898550725  | 2.380952381     | 1       |
| WT1      | 2        | 67            | 3           | 123              | 2.898550725  | 2.380952381     | 1       |
| XIAP     | 2        | 67            | 3           | 123              | 2.898550725  | 2.380952381     | 1       |
| ACTL6B   | 1        | 68            | 2           | 124              | 1.449275362  | 1.587301587     | 1       |
| ADH1B    | 1        | 68            | 2           | 124              | 1.449275362  | 1.587301587     | 1       |
| AR       | 1        | 68            | 3           | 123              | 1.449275362  | 2.380952381     | 1       |
| ARAF     | 1        | 68            | 2           | 124              | 1.449275362  | 1.587301587     | 1       |
| B2M      | 1        | 68            | 2           | 124              | 1.449275362  | 1.587301587     | 1       |
| BCL2     | 1        | 68            | 1           | 125              | 1.449275362  | 0.793650794     | 1       |
| BIRC3    | 1        | 68            | 1           | 125              | 1.449275362  | 0.793650794     | 1       |
| CDH1     | 1        | 68            | 1           | 125              | 1.449275362  | 0.793650794     | 1       |
| CDK8     | 1        | 68            | 3           | 123              | 1.449275362  | 2.380952381     | 1       |
| CHEK1    | 1        | 68            | 3           | 123              | 1.449275362  | 2.380952381     | 1       |
| CRLF2    | 1        | 68            | 2           | 124              | 1.449275362  | 1.587301587     | 1       |
| CTCF     | 1        | 68            | 1           | 125              | 1.449275362  | 0.793650794     | 1       |
| CYP2C8   | 1        | 68            | 1           | 125              | 1.449275362  | 0.793650794     | 1       |
| DAXX     | 1        | 68            | 3           | 123              | 1.449275362  | 2.380952381     | 1       |
| DIS3     | 1        | 68            | 3           | 123              | 1.449275362  | 2.380952381     | 1       |
| DPYD     | 1        | 68            | 2           | 124              | 1.449275362  | 1.587301587     | 1       |
| EML4     | 1        | 68            | 2           | 124              | 1.449275362  | 1.587301587     | 1       |
| ERCC2    | 1        | 68            | 1           | 125              | 1.449275362  | 0.793650794     | 1       |
| ETV1     | 1        | 68            | 1           | 125              | 1.449275362  | 0.793650794     | 1       |
| FANCA    | 1        | 68            | 3           | 123              | 1.449275362  | 2.380952381     | 1       |
| FANCC    | 1        | 68            | 1           | 125              | 1.449275362  | 0.793650794     | 1       |
| FANCE    | 1        | 68            | 1           | 125              | 1.449275362  | 0.793650794     | 1       |
| FANCF    | 1        | 68            | 1           | 125              | 1.449275362  | 0.793650794     | 1       |
| FANCG    | 1        | 68            | 2           | 124              | 1.449275362  | 1.587301587     | 1       |
| FANCL    | 1        | 68            | 1           | 125              | 1.449275362  | 0.793650794     | 1       |
| FGF10    | 1        | 68            | 2           | 124              | 1.449275362  | 1.587301587     | 1       |
| FGF14    | 1        | 68            | 2           | 124              | 1.449275362  | 1.587301587     | 1       |
| FGF4     | 1        | 68            | 1           | 125              | 1.449275362  | 0.793650794     | 1       |
| FOXP1    | 1        | 68            | 2           | 124              | 1.449275362  | 1.587301587     | 1       |
| GATA6    | 1        | 68            | 1           | 125              | 1.449275362  | 0.793650794     | 1       |
| GGH      | 1        | 68            | 1           | 125              | 1.449275362  | 0.793650794     | 1       |
| HIST1H3E | 1        | 68            | 2           | 124              | 1.449275362  | 1.587301587     | 1       |
| HIST1H3G | 1        | 68            | 1           | 125              | 1.449275362  | 0.793650794     | 1       |
| HIST1H3I | 1        | 68            | 2           | 124              | 1.449275362  | 1.587301587     | 1       |
| HLA-B    | 1        | 68            | 2           | 124              | 1.449275362  | 1.587301587     | 1       |
| HLA-C    | 1        | 68            | 1           | 125              | 1.449275362  | 0.793650794     | 1       |
| HSD3B1   | 1        | 68            | 1           | 125              | 1.449275362  | 0.793650794     | 1       |
| ID3      | 1        | 68            | 2           | 124              | 1.449275362  | 1.587301587     | 1       |



| Gene    | COPD_Mut | COPD_Wildtype | nonCOPD_Mut | nonCOPD_Wildtype | COPD Freq(%) | nonCOPD Freq(%) | P-value |
|---------|----------|---------------|-------------|------------------|--------------|-----------------|---------|
| IL6ST   | 1        | 68            | 1           | 125              | 1.449275362  | 0.793650794     | 1       |
| IRF4    | 1        | 68            | 2           | 124              | 1.449275362  | 1.587301587     | 1       |
| JAK1    | 1        | 68            | 2           | 124              | 1.449275362  | 1.587301587     | 1       |
| KDM5C   | 1        | 68            | 3           | 123              | 1.449275362  | 2.380952381     | 1       |
| LATS2   | 1        | 68            | 2           | 124              | 1.449275362  | 1.587301587     | 1       |
| LTK     | 1        | 68            | 1           | 125              | 1.449275362  | 0.793650794     | 1       |
| LYN     | 1        | 68            | 1           | 125              | 1.449275362  | 0.793650794     | 1       |
| MAP3K1  | 1        | 68            | 2           | 124              | 1.449275362  | 1.587301587     | 1       |
| MAPK1   | 1        | 68            | 1           | 125              | 1.449275362  | 0.793650794     | 1       |
| MAPK3   | 1        | 68            | 1           | 125              | 1.449275362  | 0.793650794     | 1       |
| MDM2    | 1        | 68            | 2           | 124              | 1.449275362  | 1.587301587     | 1       |
| MSH2    | 1        | 68            | 1           | 125              | 1.449275362  | 0.793650794     | 1       |
| MTAP    | 1        | 68            | 1           | 125              | 1.449275362  | 0.793650794     | 1       |
| MTHFR   | 1        | 68            | 1           | 125              | 1.449275362  | 0.793650794     | 1       |
| MUTYH   | 1        | 68            | 2           | 124              | 1.449275362  | 1.587301587     | 1       |
| MYB     | 1        | 68            | 2           | 124              | 1.449275362  | 1.587301587     | 1       |
| MYCN    | 1        | 68            | 1           | 125              | 1.449275362  | 0.793650794     | 1       |
| NKX2-1  | 1        | 68            | 2           | 124              | 1.449275362  | 1.587301587     | 1       |
| PARP1   | 1        | 68            | 2           | 124              | 1.449275362  | 1.587301587     | 1       |
| PARP2   | 1        | 68            | 2           | 124              | 1.449275362  | 1.587301587     | 1       |
| PARP3   | 1        | 68            | 2           | 124              | 1.449275362  | 1.587301587     | 1       |
| PIK3C3  | 1        | 68            | 3           | 123              | 1.449275362  | 2.380952381     | 1       |
| PIK3CB  | 1        | 68            | 3           | 123              | 1.449275362  | 2.380952381     | 1       |
| PIK3R1  | 1        | 68            | 2           | 124              | 1.449275362  | 1.587301587     | 1       |
| PIK3R2  | 1        | 68            | 1           | 125              | 1.449275362  | 0.793650794     | 1       |
| PLK1    | 1        | 68            | 1           | 125              | 1.449275362  | 0.793650794     | 1       |
| PMS1    | 1        | 68            | 2           | 124              | 1.449275362  | 1.587301587     | 1       |
| PMS2    | 1        | 68            | 2           | 124              | 1.449275362  | 1.587301587     | 1       |
| PPARG   | 1        | 68            | 3           | 123              | 1.449275362  | 2.380952381     | 1       |
| PRKCI   | 1        | 68            | 2           | 124              | 1.449275362  | 1.587301587     | 1       |
| PTK2    | 1        | 68            | 2           | 124              | 1.449275362  | 1.587301587     | 1       |
| RAC2    | 1        | 68            | 2           | 124              | 1.449275362  | 1.587301587     | 1       |
| RAD17   | 1        | 68            | 2           | 124              | 1.449275362  | 1.587301587     | 1       |
| RAD50   | 1        | 68            | 3           | 123              | 1.449275362  | 2.380952381     | 1       |
| RAD51C  | 1        | 68            | 2           | 124              | 1.449275362  | 1.587301587     | 1       |
| RPTOR   | 1        | 68            | 3           | 123              | 1.449275362  | 2.380952381     | 1       |
| RRM1    | 1        | 68            | 2           | 124              | 1.449275362  | 1.587301587     | 1       |
| SLC34A2 | 1        | 68            | 3           | 123              | 1.449275362  | 2.380952381     | 1       |
| SMAD2   | 1        | 68            | 1           | 125              | 1.449275362  | 0.793650794     | 1       |
| SMARCA2 | 1        | 68            | 3           | 123              | 1.449275362  | 2.380952381     | 1       |
| STAT1   | 1        | 68            | 3           | 123              | 1.449275362  | 2.380952381     | 1       |
| SUZ12   | 1        | 68            | 1           | 125              | 1.449275362  | 0.793650794     | 1       |
| TBX3    | 1        | 68            | 2           | 124              | 1.449275362  | 1.587301587     | 1       |
| TERT    | 1        | 68            | 3           | 123              | 1.449275362  | 2.380952381     | 1       |
| TFG     | 1        | 68            | 3           | 123              | 1.449275362  | 2.380952381     | 1       |
| TGFBR2  | 1        | 68            | 2           | 124              | 1.449275362  | 1.587301587     | 1       |
| TNFSF11 | 1        | 68            | 1           | 125              | 1.449275362  | 0.793650794     | 1       |
| TSC1    | 1        | 68            | 1           | 125              | 1.449275362  | 0.793650794     | 1       |
| UMPS    | 1        | 68            | 3           | 123              | 1.449275362  | 2.380952381     | 1       |
| WNT10B  | 1        | 68            | 1           | 125              | 1.449275362  | 0.793650794     | 1       |
| XRCC1   | 1        | 68            | 2           | 124              | 1.449275362  | 1.587301587     | 1       |
| ARFRP1  | 0        | 69            | 1           | 125              | 0            | 0.793650794     | 1       |
| AXIN1   | 0        | 69            | 1           | 125              | 0            | 0.793650794     | 1       |
| BCL2L1  | 0        | 69            | 1           | 125              | 0            | 0.793650794     | 1       |
| CCNE1   | 0        | 69            | 1           | 125              | 0            | 0.793650794     | 1       |
| CDA     | 0        | 69            | 1           | 125              | 0            | 0.793650794     | 1       |
| CDC42   | 0        | 69            | 1           | 125              | 0            | 0.793650794     | 1       |
| CDKN1A  | 0        | 69            | 1           | 125              | 0            | 0.793650794     | 1       |
| CXCR4   | 0        | 69            | 1           | 125              | 0            | 0.793650794     | 1       |
| CYP19A1 | 0        | 69            | 1           | 125              | 0            | 0.793650794     | 1       |
| EPCAM   | 0        | 69            | 1           | 125              | 0            | 0.793650794     | 1       |
| ERCC4   | 0        | 69            | 1           | 125              | 0            | 0.793650794     | 1       |
| ERCC5   | 0        | 69            | 1           | 125              | 0            | 0.793650794     | 1       |
| ERG     | 0        | 69            | 1           | 125              | 0            | 0.793650794     | 1       |
| EWSR1   | 0        | 69            | 1           | 125              | 0            | 0.793650794     | 1       |
| EZR     | 0        | 69            | 1           | 125              | 0            | 0.793650794     | 1       |
| FANCD2  | 0        | 69            | 1           | 125              | 0            | 0.793650794     | 1       |
| FANCI   | 0        | 69            | 1           | 125              | 0            | 0.793650794     | 1       |
| FAS     | 0        | 69            | 1           | 125              | 0            | 0.793650794     | 1       |
| FGF12   | 0        | 69            | 1           | 125              | 0            | 0.793650794     | 1       |

| Gene     | COPD_Mut | COPD_Wildtype | nonCOPD_Mut | nonCOPD_Wildtype | COPD Freq(%) | nonCOPD Freq(%) | P-value |
|----------|----------|---------------|-------------|------------------|--------------|-----------------|---------|
| FLCN     | 0        | 69            | 1           | 125              | 0            | 0.793650794     | 1       |
| FOXA1    | 0        | 69            | 1           | 125              | 0            | 0.793650794     | 1       |
| GNA11    | 0        | 69            | 1           | 125              | 0            | 0.793650794     | 1       |
| GREM1    | 0        | 69            | 1           | 125              | 0            | 0.793650794     | 1       |
| GSTP1    | 0        | 69            | 1           | 125              | 0            | 0.793650794     | 1       |
| GSTT1    | 0        | 69            | 1           | 125              | 0            | 0.793650794     | 1       |
| IFNGR1   | 0        | 69            | 1           | 125              | 0            | 0.793650794     | 1       |
| IGF1     | 0        | 69            | 1           | 125              | 0            | 0.793650794     | 1       |
| JUN      | 0        | 69            | 1           | 125              | 0            | 0.793650794     | 1       |
| LMO1     | 0        | 69            | 1           | 125              | 0            | 0.793650794     | 1       |
| MAP2K4   | 0        | 69            | 1           | 125              | 0            | 0.793650794     | 1       |
| MDM4     | 0        | 69            | 1           | 125              | 0            | 0.793650794     | 1       |
| MPL      | 0        | 69            | 1           | 125              | 0            | 0.793650794     | 1       |
| MYCL     | 0        | 69            | 1           | 125              | 0            | 0.793650794     | 1       |
| NF2      | 0        | 69            | 1           | 125              | 0            | 0.793650794     | 1       |
| NFKBIA   | 0        | 69            | 1           | 125              | 0            | 0.793650794     | 1       |
| NKX3-1   | 0        | 69            | 1           | 125              | 0            | 0.793650794     | 1       |
| NUP93    | 0        | 69            | 1           | 125              | 0            | 0.793650794     | 1       |
| PAK1     | 0        | 69            | 1           | 125              | 0            | 0.793650794     | 1       |
| PDCD1    | 0        | 69            | 1           | 125              | 0            | 0.793650794     | 1       |
| PDCD1LG2 | 0        | 69            | 1           | 125              | 0            | 0.793650794     | 1       |
| PDE4D    | 0        | 69            | 1           | 125              | 0            | 0.793650794     | 1       |
| PIM1     | 0        | 69            | 1           | 125              | 0            | 0.793650794     | 1       |
| RAD51    | 0        | 69            | 1           | 125              | 0            | 0.793650794     | 1       |
| RECQL4   | 0        | 69            | 1           | 125              | 0            | 0.793650794     | 1       |
| RHEB     | 0        | 69            | 1           | 125              | 0            | 0.793650794     | 1       |
| RPS6KA3  | 0        | 69            | 1           | 125              | 0            | 0.793650794     | 1       |
| RSPO2    | 0        | 69            | 1           | 125              | 0            | 0.793650794     | 1       |
| RUNX1    | 0        | 69            | 1           | 125              | 0            | 0.793650794     | 1       |
| SDHAF2   | 0        | 69            | 1           | 125              | 0            | 0.793650794     | 1       |
| SDHC     | 0        | 69            | 1           | 125              | 0            | 0.793650794     | 1       |
| SMARCD1  | 0        | 69            | 1           | 125              | 0            | 0.793650794     | 1       |
| STAT6    | 0        | 69            | 1           | 125              | 0            | 0.793650794     | 1       |
| SUFU     | 0        | 69            | 1           | 125              | 0            | 0.793650794     | 1       |
| TIPARP   | 0        | 69            | 1           | 125              | 0            | 0.793650794     | 1       |
| TNFRSF14 | 0        | 69            | 1           | 125              | 0            | 0.793650794     | 1       |
| WAS      | 0        | 69            | 1           | 125              | 0            | 0.793650794     | 1       |
| XPA      | 0        | 69            | 1           | 125              | 0            | 0.793650794     | 1       |
